# Supplementary material for: Soluble chickpea and lentil powders: a solution for elderly consumers interested in enriching their meals with protein
Source: Royal Society of Chemistry journal article supplement (doi:10.1039/d4fo03297g), 2025-01-01
Supplement: d4fo03297g1.xlsx [file d4fo03297g1.xlsx]

## Sheet: Proximate composition 
Llegum	Fraction	Moisture	Fat	Protein	Fibre	Carbohydrates
Chickpea	F1	11.3577	4.62917	23.017	29.2387	28.5436
Chickpea	F1	11.2344	3.61322	23.087	30.2251	28.6638
Chickpea	F2	10.1819	5.62714	23.591	13.6634	44.4749
Chickpea	F2	10.3814	4.94786	23.401	15.6942	43.141
Chickpea	F3	10.5185	3.78536	23.618	11.21	48.5736
Chickpea	F3	10.5731	5.50051	23.681	12.4799	45.4896
Lentil	F1	6.65862	1.62774	26.389	24.8002	37.933
Lentil	F1	6.42699	1.12867	26.547	24.4569	38.8859
Lentil	F2	6.62772	1.38317	24.569	21.8027	42.8429
Lentil	F2	6.719	0.918575	24.707	22.8567	42.1576
Lentil	F3	7.02535	1.09489	25.393	10.9656	53.0298
Lentil	F3	7.32887	0.993443	25.292	10.5675	53.3814
Lentil Raw	Raw	9.01673	3.35281	23.333	18.6483	42.957
Lentil Raw	Raw	8.95338	3.8445	23.488	13.3686	47.6245
Chickpea Raw	Raw	9.17032	0.630224	26.429	27.6201	33.7926
Chickpea Raw	Raw	9.05062	0.724065	25.936	28.1848	33.8406

## Sheet: Rheology
Puree sample	Fraction	Concetnration	apparent viscosity at 50 s-1(Pa.s)	G' at 1 Hz (Pa)	G'' at 1Hz(Pa)	tan delta at 1 Hz
Control Puree	0	0	1.42721	2070.7	270.327	0.130549
Control Puree	0	0	2.02558	1287.33	152.214	0.11824
Chickpea	Sieved	7.5	2.95176	2401.25	344.507	0.14347
Chickpea	Sieved	7.5	3.26822	3789.87	564.196	0.148869
Chickpea	Sieved	10	4.12117	4263.07	588.609	0.138072
Chickpea	Sieved	10	3.79633	6407.27	907.708	0.141668
Chickpea	Sieved	12.5	5.0035	5701.1	706.963	0.124005
Chickpea	Sieved	12.5	5.62437	6407.27	907.708	0.141668
Chickpea	Sieved	15	6.74564	8748.74	1450.88	0.165839
Chickpea	Sieved	15	6.27644	7964.43	1402.1	0.176045
Chickpea	Whole powder	7.5	2.88077	3406.42	611.706	0.179574
Chickpea	Whole powder	7.5	2.5116	2855.98	413.532	0.144795
Chickpea	Whole powder	10	3.829	3865.89	560.046	0.144869
Chickpea	Whole powder	10	3.64141	4293.88	652.099	0.151867
Chickpea	Whole powder	12.5	4.9331	7097.12	1006.23	0.14178
Chickpea	Whole powder	12.5	3.90903	5639.38	761.381	0.135011
Chickpea	Whole powder	15	7.17899	9851.89	1557.47	0.158089
Chickpea	Whole powder	15	5.44733	7105.38	1187.89	0.167182
Chickpea	Raw	5	2.04042	1148.14	208.614	0.181697
Chickpea	Raw	5	2.0633	1455.2	265.59	0.182511
Chickpea	Raw	7.5	5.74707	2002.15	357.645	0.17863
Chickpea	Raw	7.5	5.81352	2929.27	512.963	0.175116
Chickpea	Raw	10	10.0161	4046.91	836.473	0.206694
Chickpea	Raw	10	10.2349	4704.37	859.253	0.18265
Lentil	Sieved	7.5	2.78233	3045.27	445.394	0.146258
Lentil	Sieved	7.5	2.9637	3422.77	507.761	0.148348
Lentil	Sieved	10	4.68764	4897.06	718.592	0.146739
Lentil	Sieved	10	4.71539	4366.54	722.914	0.165558
Lentil	Sieved	12.5	6.57229	5975.41	621.617	0.104029
Lentil	Sieved	12.5	5.55021	5429.12	593.843	0.109381
Lentil	Sieved	15	9.74552	7691.48	976.502	0.126959
Lentil	Sieved	15	7.35582	6183.44	1058.41	0.171168
Lentil	Whole powder	7.5	3.30234	4200.6	670.495	0.159619
Lentil	Whole powder	7.5	3.47264	5416.88	933.87	0.1724
Lentil	Whole powder	10	4.94535	4275.18	787.227	0.184139
Lentil	Whole powder	10	3.56524	4488.69	703.794	0.156793
Lentil	Whole powder	12.5	6.30305	7536.77	1326.49	0.176002
Lentil	Whole powder	12.5	5.99326	6999.21	1218.02	0.174022
Lentil	Whole powder	15	7.47129	13118.1	2453.84	0.187058
Lentil	Whole powder	15	6.45656	11075.2	2188.21	0.197577
Lentil	Raw	5	2.33402	1440.19	281.465	0.195436
Lentil	Raw	5	2.52596	1200.19	211.465	0.176193
Lentil	Raw	7.5	5.88826	3139.64	573.07	0.182527
Lentil	Raw	7.5	5.67159	3384.68	618.691	0.182792
Lentil	Raw	10	11.3966	5081.09	954.828	0.187918
Lentil	Raw	10	10.0753	4145.85	840.837	0.202814

## Sheet: Sensory Ranks  
Evaluation	Sample	Panelist_Code	Light colour	Orange colour	Homogenety	Vegetable flavour	Legume flavour	Sweetness taste	Saltiness	Spicy flavour	thickness	Roughness	Creaminess	Preference				Evaluation Section		Panelist_Code	dark colour	Naranja_a_marrón	Homógeneo	Sabor_verdures	Sabor_legumbre	Sabor_Dulce	Sabor_Salado	Sabor_especias	Líquido_a_espeso	Suave_a_arenoso	Cremoso	Preferencia				Evaluation Section	Panelist_Code		Gender (1=man, 2=woman)	Age
Ranking chickpea samples	control	60	1	1	5	1	1	3	3	1	1	1	5	3				Ranking lentil samples	control	60	1	1	5	1	1	5	2	3	1	1	5	5				Demographics	60		2000	28
Ranking chickpea samples	CS 7.5%	60	2.5	2	4	5	5	4	4	5	2	2	4	4				Ranking lentil samples	LS 7.5%	60	3	3	4	5	2	4	4	1	2	3	3	4				Demographics	17		2000	28
Ranking chickpea samples	CW7.5%	60	2.5	3	2	3	2	5	1	2	3	3	3	5				Ranking lentil samples	LW7.5%	60	2	2	2	4	3	3	5	2	3	2	4	3				Demographics	44		1000	27
Ranking chickpea samples	CS 12.5%	60	4	4	3	4	3.5	2	5	4	4	4	2	2				Ranking lentil samples	LS 12.5%	60	5	5	3	3	4	1	1	4	4	4	2	2				Demographics	41		2000	41
Ranking chickpea samples	CW 12.5%	60	5	5	1	2	3.5	1	2	3	5	5	1	1				Ranking lentil samples	LW 12.5%	60	4	4	1	2	5	2	3	5	5	5	1	1				Demographics	49		2000	26
Ranking chickpea samples	control	17	5	1	5	5	1	5	1	4	1	1	1	4				Ranking lentil samples	control	17	1	1	5	1	1	1	5	1	1	1	1	3				Demographics	13		2000	29
Ranking chickpea samples	CS 7.5%	17	4	2.5	3.5	3	2	3.5	2	3	2	2	5	5				Ranking lentil samples	LS 7.5%	17	2.5	2.5	3	4	3	3	3	3	2	3	4	5				Demographics	55		1000	47
Ranking chickpea samples	CW7.5%	17	1.5	2.5	3.5	4	3	3.5	4	2	3	3	2	1.5				Ranking lentil samples	LW7.5%	17	2.5	2.5	4	3	2	4	4	2	3	2	5	2				Demographics	22		2000	30
Ranking chickpea samples	CS 12.5%	17	1.5	4	1.5	1	4	1	5	1	4	4	4	1.5				Ranking lentil samples	LS 12.5%	17	4	4	2	5	5	5	1	4	5	5	2	1				Demographics	10		1000	27
Ranking chickpea samples	CW 12.5%	17	3	5	1.5	2	5	2	3	5	5	5	3	3				Ranking lentil samples	LW 12.5%	17	5	5	1	2	4	2	2	5	4	4	3	4				Demographics	34		2000	38
Ranking chickpea samples	control	44	5	5	5	1	1	5	1	2	5	1	2	1				Ranking lentil samples	control	44	1	1	1	5	1	3	2	1	1	1	1	4				Demographics	11		2000	22
Ranking chickpea samples	CS 7.5%	44	1	1	4	5	2	4	2	1	3	3	4	2				Ranking lentil samples	LS 7.5%	44	3	3	2	3.5	2.5	5	3	3	2	2	2.5	5				Demographics	21		2000	27
Ranking chickpea samples	CW7.5%	44	3	3	1	2	4	1	5	5	1	5	1	5				Ranking lentil samples	LW7.5%	44	2	2	3	3.5	5	1	4	4.5	3	3	2.5	1				Demographics	54		1000	27
Ranking chickpea samples	CS 12.5%	44	4	4	3	4	3	2	4	3	4	2	5	3				Ranking lentil samples	LS 12.5%	44	4.5	5	4	2	2.5	4	5	2	4	4	4	3				Demographics	16		1000	32
Ranking chickpea samples	CW 12.5%	44	2	2	2	3	5	3	3	4	2	4	3	4				Ranking lentil samples	LW 12.5%	44	4.5	4	5	1	4	2	1	4.5	5	5	5	2				Demographics	20		1000	26
Ranking chickpea samples	control	41	1	1	5	1	1	4	2	1.5	1	1	1	2				Ranking lentil samples	control	41	1	1	5	5	1	3	2	1	1	1	1	2				Demographics	18		2000	29
Ranking chickpea samples	CS 7.5%	41	2	2	4	2	2	5	1	1.5	2	2	2	4				Ranking lentil samples	LS 7.5%	41	3	3	4	3	3	5	5	4.5	2	2	5	4				Demographics	36		1000	44
Ranking chickpea samples	CW7.5%	41	5	4	3	3	3	2	3	4	3	3	5	3				Ranking lentil samples	LW7.5%	41	2	2	3	4	2	4	3	4.5	3	3	2	5				Demographics	19		2000	24
Ranking chickpea samples	CS 12.5%	41	4	3	2	5	4	3	4	4	4	4	4	5				Ranking lentil samples	LS 12.5%	41	5	5	2	2	4	2	4	2.5	4	4	4	1				Demographics	27		2000	29
Ranking chickpea samples	CW 12.5%	41	3	5	1	4	5	1	5	4	5	5	3	1				Ranking lentil samples	LW 12.5%	41	4	4	1	1	5	1	1	2.5	5	5	3	3				Demographics	50		2000	52
Ranking chickpea samples	control	49	5	5	5	1	1	5	4	1	1	1	5	4				Ranking lentil samples	control	49	1	1	5	1	1	4	1	1.5	1	1	5	3				Demographics	53		2000	27
Ranking chickpea samples	CS 7.5%	49	4	4	4	2	3	3	5	2	2	2	4	5				Ranking lentil samples	LS 7.5%	49	3	2.5	4	2	2	2	4	5	3	2	4	4.5				Demographics	30		1000	25
Ranking chickpea samples	CW7.5%	49	3	3	3	4	2	4	2	5	3	3	3	2				Ranking lentil samples	LW7.5%	49	4	4.5	2	3.5	4	5	2	1.5	5	4	2	4.5				Demographics	56		1000	29
Ranking chickpea samples	CS 12.5%	49	1	1.5	1.5	5	5	1	1	3	4	4	2	3				Ranking lentil samples	LS 12.5%	49	2	2.5	3	5	5	3	3	3	2	3	3	1				Demographics	2		1000	25
Ranking chickpea samples	CW 12.5%	49	2	1.5	1.5	3	4	2	3	4	5	5	1	1				Ranking lentil samples	LW 12.5%	49	5	4.5	1	3.5	3	1	5	4	4	5	1	2				Demographics	32		2000	26
Ranking chickpea samples	control	13	1	1	5	5	1	5	1	1	1	1	1	1				Ranking lentil samples	control	13	1	1	5	4	1	5	1	1	1	1	1	1				Demographics	59		1000	29
Ranking chickpea samples	CS 7.5%	13	2	2	4	4	5	3	2	4	3	2	4	2				Ranking lentil samples	LS 7.5%	13	3	3	3.5	1	5	3.5	2	3	3	3	4	3.5				Demographics	28		2000	28
Ranking chickpea samples	CW7.5%	13	3.5	3.5	3	1	4	4	4	2	2	4	3	3				Ranking lentil samples	LW7.5%	13	2	2	3.5	3	3	3.5	3	2	2	2	3	3.5				Demographics	1		2000	26
Ranking chickpea samples	CS 12.5%	13	3.5	3.5	2	2.5	2.5	1	5	3	4	3	5	5				Ranking lentil samples	LS 12.5%	13	5	5	2	2	4	1	5	4	4	4	5	5				Demographics	51		2000	62
Ranking chickpea samples	CW 12.5%	13	5	5	1	2.5	2.5	2	3	5	5	5	2	4				Ranking lentil samples	LW 12.5%	13	4	4	1	5	2	2	4	5	5	5	2	2				Demographics	12		1000	29
Ranking chickpea samples	control	55	3	3	5	1	5	4.5	3	2	1	1	1	5				Ranking lentil samples	control	55	1	1	1	1	1	5	1	1	1	1	5	3				Demographics	47		2000	36
Ranking chickpea samples	CS 7.5%	55	3	3	4	3	3	3	3	1	3	3	3	3				Ranking lentil samples	LS 7.5%	55	2	3	2	3	3	3	3	3	2	2	1	3				Demographics	45		1000	30
Ranking chickpea samples	CW7.5%	55	3	3	3	2	4	1	3	5	2	2	2	4				Ranking lentil samples	LW7.5%	55	3	2	3	2	2	4	2	2	3	3	2	3				Demographics	61		2000	24
Ranking chickpea samples	CS 12.5%	55	3	3	2	5	1	4.5	3	3	5	5	5	1.5				Ranking lentil samples	LS 12.5%	55	4.5	4.5	4.5	4	4	2	4	4	4.5	4	3	3				Demographics	42		2000	28
Ranking chickpea samples	CW 12.5%	55	3	3	1	4	2	2	3	4	4	4	4	1.5				Ranking lentil samples	LW 12.5%	55	4.5	4.5	4.5	5	5	1	5	5	4.5	5	4	3				Demographics	39		2000	26
Ranking chickpea samples	control	22	5	5	5	3	1	1.5	4	3	1	1	5	5				Ranking lentil samples	control	22	1	1	5	4	1	3	5	1	1	1	5	5				Demographics	38		1000	26
Ranking chickpea samples	CS 7.5%	22	3.5	3.5	3.5	1	2	1.5	3	2	2.5	2.5	4	4				Ranking lentil samples	LS 7.5%	22	2.5	2.5	3.5	2	3	5	1	3	2	2	4	4				Demographics	14		2000	29
Ranking chickpea samples	CW7.5%	22	3.5	3.5	3.5	5	3	3	5	1	2.5	2.5	3	3				Ranking lentil samples	LW7.5%	22	2.5	2.5	3.5	3	2	4	4	5	3	3	3	3				Demographics	23		2000	26
Ranking chickpea samples	CS 12.5%	22	1.5	1.5	2	2	4	4	1	5	4.5	4	2	2				Ranking lentil samples	LS 12.5%	22	4.5	4.5	2	5	4	2	2	2	4.5	4	2	2				Demographics	35		1000	27
Ranking chickpea samples	CW 12.5%	22	1.5	1.5	1	4	5	5	2	4	4.5	5	1	1				Ranking lentil samples	LW 12.5%	22	4.5	4.5	1	1	5	1	3	4	4.5	5	1	1				Demographics	37		2000	26
Ranking chickpea samples	control	10	4	1	1	5	1	3	4	1	1	1	1	2				Ranking lentil samples	control	10	1	1	5	5	1	4	5	3	1	1	2	2				Demographics	48		1000	23
Ranking chickpea samples	CS 7.5%	10	1	2.5	3	1	3	5	3	3	2	3	3	5				Ranking lentil samples	control	10	2	2	4	4	2	5	4	4	2	2	5	5				Demographics	29		2000	28
Ranking chickpea samples	CW7.5%	10	5	4	2	2	2	4	5	2	3	4	5	3				Ranking lentil samples	LS 7.5%	10	3	3	2	2	3	3	3	5	3	3	3	4				Demographics	57		1000	48
Ranking chickpea samples	CS 12.5%	10	2.5	2.5	4	3	5	2	1	4	4	2	2	4				Ranking lentil samples	LW7.5%	10	5	4	3	1	5	1	2	1	4	4	4	3				Demographics	52		1000	35
Ranking chickpea samples	CW 12.5%	10	2.5	5	5	4	4	1	2	5	5	5	4	1				Ranking lentil samples	LS 12.5%	10	4	5	1	3	4	2	1	2	5	5	1	1				Demographics	43		1000	25
Ranking chickpea samples	control	34	1	1	5	3	5	5	2	3	1	1	3	4				Ranking lentil samples	LW 12.5%	34	1	1	5	4	1	5	1	1	1	1	5	4				Demographics	9		2000	27
Ranking chickpea samples	CS 7.5%	34	3	2.5	4	4	4	2	5	4	2	2	5	5				Ranking lentil samples	control	34	3	2.5	3	5	3	4	3.5	2	3	2	3.5	5				Demographics	46		2000	28
Ranking chickpea samples	CW7.5%	34	2	2.5	3	5	3	4	4	1	3	3	4	3				Ranking lentil samples	LS 7.5%	34	2	2.5	4	3	2	1	2	4	2	3	3.5	3				Demographics	6		2000	26
Ranking chickpea samples	CS 12.5%	34	4	4	1	1	1	1	1	5	5	4	1	2				Ranking lentil samples	LW7.5%	34	5	5	2	1	4	2	3.5	5	4	4	2	2				Demographics	33		2000	26
Ranking chickpea samples	CW 12.5%	34	5	5	2	2	2	3	3	2	4	5	2	1				Ranking lentil samples	LS 12.5%	34	4	4	1	2	5	3	5	3	5	5	1	1				Demographics	40		2000	43
Ranking chickpea samples	control	11	5	1	5	5	1	5	1	5	1	1	5	4				Ranking lentil samples	LW 12.5%	11	1	1	5	1	1	5	1	1	1	1	5	1				Demographics	8		2000	31
Ranking chickpea samples	CS 7.5%	11	3	4	4	4	2	4	2	3	2	2	4	5				Ranking lentil samples	control	11	2	2	4	2	2	4	3	3	3	3	3	4				Demographics	26		2000	25
Ranking chickpea samples	CW7.5%	11	2	2	3	2	3	3	3	4	3	3	3	3				Ranking lentil samples	LS 7.5%	11	3	3	2	3	3	3	2	2	2	2	4	5				Demographics	24		2000	42
Ranking chickpea samples	CS 12.5%	11	1	3	2	3	4	2	4	2	4	4	2	2				Ranking lentil samples	LW7.5%	11	4	4	3	4	4	1	5	5	4	4	2	3				Demographics	4		2000	54
Ranking chickpea samples	CW 12.5%	11	4	5	1	1	5	1	5	1	5	5	1	1				Ranking lentil samples	LS 12.5%	11	5	5	1	5	5	2	4	4	5	5	1	2				Demographics	58		1000	24
Ranking chickpea samples	control	21	5	1	5	5	1	5	4	1	5	5	4	3				Ranking lentil samples	LW 12.5%	21	1	1	5	1	1	5	5	1	1	1	3	1				Demographics	31		2000	32
Ranking chickpea samples	CS 7.5%	21	3	2	3.5	2	2.5	4	1	4	3	4	5	5				Ranking lentil samples	control	21	4	3	3	5	2	2	4	3	3	2	5	2				Demographics	7		1000	25
Ranking chickpea samples	CW7.5%	21	4	5	3.5	1	2.5	1.5	2.5	2	4	1	2	4				Ranking lentil samples	LS 7.5%	21	2	2	4	3	5	3	2.5	5	2	3	2	4				Demographics	5		2000	37
Ranking chickpea samples	CS 12.5%	21	1	3	2	3	4	3	2.5	3	1	3	1	1				Ranking lentil samples	LW7.5%	21	5	5	2	4	3	4	1	2	4	4	4	3				Demographics	3		1000	27
Ranking chickpea samples	CW 12.5%	21	2	4	1	4	5	1.5	5	5	2	2	3	2				Ranking lentil samples	LS 12.5%	21	3	4	1	2	4	1	2.5	4	5	5	1	5				Demographics	25		2000	55
Ranking chickpea samples	control	54	5	5	1	4	3	1	1	4	1	1	5	4				Ranking lentil samples	LW 12.5%	54	1	1	1	1	1	2	4	5	1	1	5	5
Ranking chickpea samples	CS 7.5%	54	4	4	2	5	5	5	5	5	2	2	4	5				Ranking lentil samples	control	54	2	2	4	2	3	4	5	2	3	3	1	2
Ranking chickpea samples	CW7.5%	54	3	3	3	1	1	4	4	3	3	3	3	3				Ranking lentil samples	LS 7.5%	54	3	3	2	3	2	1	1	1	2	5	3	3
Ranking chickpea samples	CS 12.5%	54	1	1	4	2	2	2	2	1	4	5	1	2				Ranking lentil samples	LW7.5%	54	5	5	3	5	4	5	2	4	5	2	4	4
Ranking chickpea samples	CW 12.5%	54	2	2	5	3	4	3	3	2	5	4	2	1				Ranking lentil samples	LS 12.5%	54	4	4	5	4	5	3	3	3	4	4	2	1
Ranking chickpea samples	control	16	1	1	5	1	1	2	5	5	1	1	5	1				Ranking lentil samples	LW 12.5%	16	1	1	1	2	1	5	1	1	1	1	5	1
Ranking chickpea samples	CS 7.5%	16	2	3	4	2	2	4.5	1.5	1	3	2	4	5				Ranking lentil samples	control	16	3	3	2.5	4	2	2	5	4	2	2	4	2
Ranking chickpea samples	CW7.5%	16	3	2	3	3	3	4.5	1.5	2	2	3	3	4				Ranking lentil samples	LS 7.5%	16	2	2	2.5	3	3	3	3.5	5	3	3	3	3
Ranking chickpea samples	CS 12.5%	16	4	4	2	5	5	3	3	3.5	4	4	2	3				Ranking lentil samples	LW7.5%	16	5	4	4	1	4	1	3.5	3	5	5	2	4
Ranking chickpea samples	CW 12.5%	16	5	5	1	4	4	1	4	3.5	5	5	1	2				Ranking lentil samples	LS 12.5%	16	4	5	5	5	5	4	2	2	4	4	1	5
Ranking chickpea samples	control	20	4	1.5	1	1	1	1	1	4	1	1	1	1				Ranking lentil samples	LW 12.5%	20	1	1	5	1	1	5	1	1	1	1	5	3
Ranking chickpea samples	CS 7.5%	20	3	1.5	2	3	2	5	2	5	2	2	2	2				Ranking lentil samples	control	20	3	2	4	2	3	3	5	2	3	2	4	5
Ranking chickpea samples	CW7.5%	20	5	3	3	2	3	2	5	3	3	3	3	3				Ranking lentil samples	LS 7.5%	20	2	3	3	5	2	1	4	3	2	4	3	1
Ranking chickpea samples	CS 12.5%	20	2	4.5	4	5	5	4	4	2	5	4	4	5				Ranking lentil samples	LW7.5%	20	5	5	2	4	4	2	2	5	4	3	2	4
Ranking chickpea samples	CW 12.5%	20	1	4.5	5	4	4	3	3	1	4	5	5	4				Ranking lentil samples	LS 12.5%	20	4	4	1	3	5	4	3	4	5	5	1	2
Ranking chickpea samples	control	18	5	5	5	5	2	5	4	4	5	1	5	3				Ranking lentil samples	LW 12.5%	18	1	1	1	2	1	5	2	5	5	5	5	3
Ranking chickpea samples	CS 7.5%	18	3.5	1	4	3	3	4	3	2	3.5	2	4	5				Ranking lentil samples	control	18	2.5	2.5	2	3	3	4	5	1.5	4	4	3	5
Ranking chickpea samples	CW7.5%	18	3.5	2	3	4	1	3	5	5	3.5	5	2	4				Ranking lentil samples	LS 7.5%	18	2.5	2.5	3	1	3	3	3	1.5	3	2	4	4
Ranking chickpea samples	CS 12.5%	18	1	3	2	1	5	2	2	2	2	3.5	2	2				Ranking lentil samples	LW7.5%	18	5	5	4	4	3	2	1	3.5	2	3	2	2
Ranking chickpea samples	CW 12.5%	18	2	4	1	2	4	1	1	2	1	3.5	2	1				Ranking lentil samples	LS 12.5%	18	4	4	5	5	5	1	4	3.5	1	1	1	1
Ranking chickpea samples	control	36	5	1	5	5	1	5	5	3	1	1	1	4.5				Ranking lentil samples	LW 12.5%	36	1	1	5	3	3	1	1	1	1	1	5	4
Ranking chickpea samples	CS 7.5%	36	3.5	2.5	3.5	3.5	2	3.5	3.5	4.5	2	2	5	4.5				Ranking lentil samples	control	36	3	3	4	4	4	4	2	3	3	2	4	5
Ranking chickpea samples	CW7.5%	36	1.5	4.5	2	2	5	1.5	1.5	2	4	4	3	2				Ranking lentil samples	control	36	2	2	2	2	5	2	3	4	2	5	1	2
Ranking chickpea samples	CS 12.5%	36	3.5	2.5	3.5	3.5	3	3.5	3.5	4.5	3	3	4	3				Ranking lentil samples	LS 7.5%	36	5	5	3	1	1	5	5	2	4	3	3	1
Ranking chickpea samples	CW 12.5%	36	1.5	4.5	1	1	4	1.5	1.5	1	5	5	2	1				Ranking lentil samples	LW7.5%	36	4	4	1	5	2	3	4	5	5	4	2	3
Ranking chickpea samples	control	19	5	5	5	5	1	1	5	1	1	1	5	5				Ranking lentil samples	LS 12.5%	19	1	1	5	5	1	1	5	1	1	1	5	5
Ranking chickpea samples	CS 7.5%	19	1.5	1.5	3	3.5	2.5	4	4	2	2.5	2.5	4	1				Ranking lentil samples	LW 12.5%	19	2.5	2.5	3.5	3.5	5	2.5	1.5	2	2	2	4	3
Ranking chickpea samples	CW7.5%	19	1.5	1.5	4	3.5	2.5	5	3	5	2.5	2.5	2	2				Ranking lentil samples	control	19	2.5	2.5	3.5	3.5	4	2.5	1.5	3	3	3	3	4
Ranking chickpea samples	CS 12.5%	19	3.5	3.5	2	1.5	5	2.5	1.5	4	4.5	4.5	3	4				Ranking lentil samples	LS 7.5%	19	5	5	1.5	1	2.5	4.5	3.5	4	5	5	1	1
Ranking chickpea samples	CW 12.5%	19	3.5	3.5	1	1.5	4	2.5	1.5	3	4.5	4.5	1	3				Ranking lentil samples	LW7.5%	19	4	4	1.5	2	2.5	4.5	3.5	5	4	4	2	2
Ranking chickpea samples	control	27	5	1	5	5	1	5	1	5	1	1	1	4				Ranking lentil samples	LS 12.5%	27	1	1	5	5	1	5	1	5	1	1	3	5
Ranking chickpea samples	CS 7.5%	27	3	3	4	4	3	3	2	2	2	2	2	5				Ranking lentil samples	LW 12.5%	27	2.5	3	3.5	4	2.5	4	2.5	1.5	2.5	2	4.5	4
Ranking chickpea samples	CW7.5%	27	4	2	3	3	2	2	5	3.5	3	4	3	2				Ranking lentil samples	control	27	2.5	2	3.5	3	2.5	2	2.5	1.5	2.5	3	4.5	3
Ranking chickpea samples	CS 12.5%	27	1	4	2	1.5	5	1	3	3.5	4.5	3	4.5	3				Ranking lentil samples	LS 7.5%	27	5	5	2	1.5	5	1	4.5	3	4	5	1	1
Ranking chickpea samples	CW 12.5%	27	2	5	1	1.5	4	4	4	1	4.5	5	4.5	1				Ranking lentil samples	LW7.5%	27	4	4	1	1.5	4	3	4.5	4	5	4	2	2
Ranking chickpea samples	control	50	5	1	5	5	1	5	1	5	1	1	5	1				Ranking lentil samples	LS 12.5%	50	1	1	5	1	1	5	1	1	1	1	5	5
Ranking chickpea samples	CS 7.5%	50	4	3	4	4	2	2	4	2	2.5	2	4	4.5				Ranking lentil samples	LW 12.5%	50	2.5	2.5	3.5	5	2	2	3	3	2.5	2	3.5	4
Ranking chickpea samples	CW7.5%	50	3	2	3	3	3	1	5	1	2.5	3	3	4.5				Ranking lentil samples	control	50	2.5	2.5	3.5	3	3	1	2	2	2.5	4	3.5	2
Ranking chickpea samples	CS 12.5%	50	1	4	2	1	5	3	3	3	4.5	5	1	2.5				Ranking lentil samples	LS 7.5%	50	4.5	4.5	1.5	4	5	4	5	5	4.5	3	1.5	3
Ranking chickpea samples	CW 12.5%	50	2	5	1	2	4	4	2	4	4.5	4	2	2.5				Ranking lentil samples	LW7.5%	50	4.5	4.5	1.5	2	4	3	4	4	4.5	5	1.5	1
Ranking chickpea samples	control	53	5	1	5	3	1	5	5	5	1	1	1	3				Ranking lentil samples	LS 12.5%	53	1	1	5	5	5	5	5	1	1	1	5	3
Ranking chickpea samples	CS 7.5%	53	4	2	4	1	2	4	4	2	2	2	5	2				Ranking lentil samples	LW 12.5%	53	3	3	3	3	3	4	3	4	2	3	1	2
Ranking chickpea samples	CW7.5%	53	3	3	3	2	3	3	3	1	3	3	4	1				Ranking lentil samples	control	53	2	2	4	4	4	2	4	5	3	2	2	1
Ranking chickpea samples	CS 12.5%	53	1	5	1	5	5	1	1	3	5	5	3	5				Ranking lentil samples	LS 7.5%	53	5	5	1	1	1	3	2	3	4	4	3	5
Ranking chickpea samples	CW 12.5%	53	2	4	2	4	4	2	2	4	4	4	2	4				Ranking lentil samples	LW7.5%	53	4	4	2	2	2	1	1	2	5	5	4	4
Ranking chickpea samples	control	30	5	1	5	4	2	5	5	1.5	1	1	5	5				Ranking lentil samples	LS 12.5%	30	1	1	5	4	1	4.5	1.5	1	1	1	5	3.5
Ranking chickpea samples	CS 7.5%	30	3	2.5	3.5	3	3	3.5	3.5	3	2	2	4	4				Ranking lentil samples	LW 12.5%	30	3	3	3.5	3	2.5	4.5	1.5	4	2.5	2.5	3.5	3.5
Ranking chickpea samples	CW7.5%	30	1	2.5	3.5	5	1	1	1	1.5	3	3	3	3				Ranking lentil samples	control	30	2	2	3.5	1	2.5	3	3	2	2.5	2.5	3.5	1
Ranking chickpea samples	CS 12.5%	30	3	4.5	2	1.5	4.5	2	2	5	4.5	4.5	2	1.5				Ranking lentil samples	LS 7.5%	30	4	4	1.5	2	4	1.5	4.5	4	4.5	4.5	1.5	2
Ranking chickpea samples	CW 12.5%	30	3	4.5	1	1.5	4.5	3.5	3.5	4	4.5	4.5	1	1.5				Ranking lentil samples	LW7.5%	30	5	5	1.5	5	5	1.5	4.5	4	4.5	4.5	1.5	5
Ranking chickpea samples	control	25	5	1	5	5	1	5	1	4	1	1	4	2				Ranking lentil samples	LS 12.5%	25	1	1	5	5	1	5	3	1	1	1	5	5
Ranking chickpea samples	CS 7.5%	25	3	2.5	3	3	2	4	3	5	2	2	5	4				Ranking lentil samples	LW 12.5%	25	3	3	3	4	3	3.5	3	3	3	2	3	3.5
Ranking chickpea samples	CW7.5%	25	4	4.5	4	4	3	3	2	3	3	3	3	5				Ranking lentil samples	control	25	2	2	4	3	2	3.5	3	3	2	3	4	3.5
Ranking chickpea samples	CS 12.5%	25	1	2.5	2	2	4	1	5	1	4.5	4	2	1				Ranking lentil samples	LS 7.5%	25	4.5	4.5	1	1	4	1	3	3	4	5	2	2
Ranking chickpea samples	CW 12.5%	25	2	4.5	1	1	5	2	4	2	4.5	5	1	3				Ranking lentil samples	LW7.5%	25	4.5	4.5	2	2	5	2	3	5	5	4	1	1
Ranking chickpea samples	control	56	5	1	5	5	1	5	1	5	1	1	1	5				Ranking lentil samples	LS 12.5%	56	1	1	5	5	1	5	1	5	1	1	1	5
Ranking chickpea samples	CS 7.5%	56	4	3	4	4	3	4	5	4	3	2	2	4				Ranking lentil samples	LW 12.5%	56	3	3	3	1	5	1	5	1	3	3	3	4
Ranking chickpea samples	CW7.5%	56	3	2	3	3	2	3	4	3	2	3	3	3				Ranking lentil samples	control	56	2	2	4	2	4	2	4	2	2	2	2	2.5
Ranking chickpea samples	CS 12.5%	56	1.5	4	2	2	4	2	3	2	5	4	4	2				Ranking lentil samples	LS 7.5%	56	5	5	1	4	2	4	2	4	5	5	5	1
Ranking chickpea samples	CW 12.5%	56	1.5	5	1	1	5	1	2	1	4	5	5	1				Ranking lentil samples	LW7.5%	56	4	4	2	3	3	3	3	3	4	4	4	2.5
Ranking chickpea samples	control	2	5	1	1	5	1	5	5	1	1	1	1	2				Ranking lentil samples	LS 12.5%	2	1	1	1	1	1	5	5	1	1	1	3	3
Ranking chickpea samples	CS 7.5%	2	3.5	4.5	2	3	3	4	4	2.5	2	2	3	1				Ranking lentil samples	LW 12.5%	2	3	3	2	3	3	4	4	4	3	2	4	1
Ranking chickpea samples	CW7.5%	2	3.5	4.5	3	4	2	1	1	2.5	3	4	2	3				Ranking lentil samples	control	2	2	2	4	2	2	1	3	2	2	4	2	4
Ranking chickpea samples	CS 12.5%	2	1.5	2.5	4.5	2	4	2	2	4.5	4.5	3	4	4				Ranking lentil samples	control	2	5	5	3	5	5	2	1	3	4	3	5	2
Ranking chickpea samples	CW 12.5%	2	1.5	2.5	4.5	1	5	3	3	4.5	4.5	5	5	5				Ranking lentil samples	LS 7.5%	2	4	4	5	4	4	3	2	5	5	5	1	5
Ranking chickpea samples	control	32	1.5	1.5	5	5	1	5	1	3	1	1	4	1				Ranking lentil samples	LW7.5%	32	1	1	5	4.5	5	1	5	1.5	1	1	4	1
Ranking chickpea samples	CS 7.5%	32	3.5	1.5	4	3	2	4	3	2	2	2	5	2				Ranking lentil samples	LS 12.5%	32	3	2.5	4	4.5	3.5	2	1	1.5	2	2	5	4
Ranking chickpea samples	CW7.5%	32	5	3	3	2	5	3	2	1	3	3	3	5				Ranking lentil samples	LW 12.5%	32	2	2.5	3	3	3.5	3	2	5	3	3	3	2
Ranking chickpea samples	CS 12.5%	32	3.5	4.5	1.5	4	3	2	4	5	4.5	4	2	3				Ranking lentil samples	control	32	4.5	4.5	2	2	1.5	4	4	3.5	4	4	2	5
Ranking chickpea samples	CW 12.5%	32	1.5	4.5	1.5	1	4	1	5	4	4.5	5	1	4				Ranking lentil samples	LS 7.5%	32	4.5	4.5	1	1	1.5	5	3	3.5	5	5	1	3
Ranking chickpea samples	control	59	1	1	5	4	1	5	1	1	1	1	1	2				Ranking lentil samples	LW7.5%	59	1	1	1	1	1	5	1	1	1	1	1	3
Ranking chickpea samples	CS 7.5%	59	3	2	4	5	2	2	3	3	2	2	5	4				Ranking lentil samples	LS 12.5%	59	3	3	3	5	3	4	4	4	3	2	4	5
Ranking chickpea samples	CW7.5%	59	2	3	3	3	3	4	2	2	3	3	4	5				Ranking lentil samples	LW 12.5%	59	2	2	2	4	2	3	5	3	2	3	5	4
Ranking chickpea samples	CS 12.5%	59	5	4	1	2	4	3	5	4	4	4	3	1				Ranking lentil samples	control	59	5	5	4	2	5	1	2	2	5	5	2	1
Ranking chickpea samples	CW 12.5%	59	4	5	2	1	5	1	4	5	5	5	2	3				Ranking lentil samples	LS 7.5%	59	4	4	5	3	4	2	3	5	4	4	3	2
Ranking chickpea samples	control	28	5	1	5	5	1	5	1	3	1	1	1	4				Ranking lentil samples	LW7.5%	28	1	1	5	5	1	5	1	1	1	1	5	4
Ranking chickpea samples	CS 7.5%	28	1	2	4	4	2	4	2	3	2	2	5	5				Ranking lentil samples	LS 12.5%	28	3	3	3	1	2	3.5	2	2	2	2	4	5
Ranking chickpea samples	CW7.5%	28	2	3	3	3	3	2	4	3	3	3	4	3				Ranking lentil samples	LW 12.5%	28	2	2	4	4	3	3.5	3	3	3	3	3	3
Ranking chickpea samples	CS 12.5%	28	3	5	1	1	5	3	3	3	4	4	2	2				Ranking lentil samples	control	28	5	5	1	3	4.5	1.5	5	4	4	4	2	2
Ranking chickpea samples	CW 12.5%	28	4	4	2	2	4	1	5	3	5	5	3	1				Ranking lentil samples	LS 7.5%	28	4	4	2	2	4.5	1.5	4	5	5	5	1	1
Ranking chickpea samples	control	1	1	1	5	5	1	5	1	1	1	1	5	3				Ranking lentil samples	LW7.5%	1	1	1	5	5	1	5	5	1	1	1	5	4
Ranking chickpea samples	CS 7.5%	1	4	3	4	4	2	4	2	2	2	2	4	4				Ranking lentil samples	LS 12.5%	1	2.5	2.5	3.5	4	2.5	3	3	3	2	2	4	5
Ranking chickpea samples	CW7.5%	1	2	2	3	3	3	3	3	3	3	3	3	5				Ranking lentil samples	LW 12.5%	1	2.5	2.5	3.5	3	2.5	4	4	2	3	3	2	2
Ranking chickpea samples	CS 12.5%	1	3	5	2	2	5	1	5	5	5	5	1	1				Ranking lentil samples	control	1	4.5	4.5	2	2	5	1	1	5	4	4	3	3
Ranking chickpea samples	CW 12.5%	1	5	4	1	1	4	2	4	4	4	4	2	2				Ranking lentil samples	LS 7.5%	1	4.5	4.5	1	1	4	2	2	4	5	5	1	1
Ranking chickpea samples	control	51	5	1	5	1	1	1	1	1	1	1	5	2				Ranking lentil samples	LW7.5%	51	1	1	5	1	1	5	1	1	1	1	5	3
Ranking chickpea samples	CS 7.5%	51	4	2	3	2	3	3.5	4	2.5	2	2	4	3				Ranking lentil samples	LS 12.5%	51	3	3	3	2.5	3	4	2	5	2	2	4	5
Ranking chickpea samples	CW7.5%	51	3	3	4	3	2	2	2	5	3	4	2.5	4.5				Ranking lentil samples	LW 12.5%	51	2	2	4	4	2	2	3	2	3	4	2	1
Ranking chickpea samples	CS 12.5%	51	1	4.5	1.5	4	4	3.5	5	2.5	5	3	2.5	4.5				Ranking lentil samples	control	51	5	4.5	1	2.5	5	3	4	3	4	3	3	2
Ranking chickpea samples	CW 12.5%	51	2	4.5	1.5	5	5	5	3	4	4	5	1	1				Ranking lentil samples	LS 7.5%	51	4	4.5	2	5	4	1	5	4	5	5	1	4
Ranking chickpea samples	control	12	5	1	5	5	1	5	1	1	1	1	3	1.5				Ranking lentil samples	LW7.5%	12	1	1	5	5	1	5	1	1	1	1	3	2
Ranking chickpea samples	CS 7.5%	12	4	3	3	4	2.5	4	2.5	2.5	2	2	3	3.5				Ranking lentil samples	LS 12.5%	12	3	3	3.5	3.5	2.5	2.5	4	2.5	3	2.5	3	4
Ranking chickpea samples	CW7.5%	12	2.5	3	4	2.5	2.5	2	2.5	2.5	3	3	3	1.5				Ranking lentil samples	LW 12.5%	12	2	2	3.5	3.5	2.5	2.5	2	2.5	2	4	3	2
Ranking chickpea samples	CS 12.5%	12	2.5	3	2	2.5	5	2	4.5	5	4	4	3	5				Ranking lentil samples	control	12	4.5	5	2	2	5	2.5	4	4	5	2.5	3	5
Ranking chickpea samples	CW 12.5%	12	1	5	1	1	4	2	4.5	4	5	5	3	3.5				Ranking lentil samples	LS 7.5%	12	4.5	4	1	1	4	2.5	4	5	4	5	3	2
Ranking chickpea samples	control	47	4	2	4	4	4	4	2	1	2	2	2	4				Ranking lentil samples	LW7.5%	47	1	1	5	1	1	5	1	2	1	1	5	1
Ranking chickpea samples	CS 7.5%	47	5	1	5	1	2	5	1	3	1	1	3	3				Ranking lentil samples	LS 12.5%	47	5	5	2	2	4	3	4	4	5	5	2	3
Ranking chickpea samples	CW7.5%	47	3	3	3	2	1	3	3	2	3	3	1	5				Ranking lentil samples	LW 12.5%	47	2	2	3	3	5	1	3	3	3	2	4	5
Ranking chickpea samples	CS 12.5%	47	2	4	2	3	3	1	5	5	5	4	4	1				Ranking lentil samples	control	47	4	4	1	4	3	2	5	5	4	4	1	2
Ranking chickpea samples	CW 12.5%	47	1	5	1	5	5	2	4	4	4	5	5	2				Ranking lentil samples	LS 7.5%	47	3	3	4	5	2	4	2	1	2	3	3	4
Ranking chickpea samples	control	45	1	1	1	1	1	5	1	1	1	1	1	4				Ranking lentil samples	LW7.5%	45	1	1	1	3	1	5	5	1	1	1	4	4
Ranking chickpea samples	CS 7.5%	45	2.5	2.5	2	3	3	4	4	5	3	2	5	5				Ranking lentil samples	LS 12.5%	45	2.5	2.5	2	5	2	4	4	4	3	2	5	5
Ranking chickpea samples	CW7.5%	45	2.5	2.5	3	4	2	3	3	4	2	4	2	2				Ranking lentil samples	LW 12.5%	45	2.5	2.5	4	4	3	3	3	2	2	4	2	3
Ranking chickpea samples	CS 12.5%	45	4.5	4.5	4.5	5	5	1	2	3	4.5	3	4	1				Ranking lentil samples	control	45	4.5	4.5	5	1	5	1	1	5	5	5	1	1
Ranking chickpea samples	CW 12.5%	45	4.5	4.5	4.5	2	4	2	5	2	4.5	5	3	3				Ranking lentil samples	control	45	4.5	4.5	3	2	4	2	2	3	4	3	3	2
Ranking chickpea samples	control	61	1	1	5	5	1	2	2	1	1	1	1	4				Ranking lentil samples	LS 7.5%	61	1	1	5	5	1	1.5	3	1	1	1	1	3
Ranking chickpea samples	CS 7.5%	61	3	2	4	4	3	5	1	4	4	3	2	5				Ranking lentil samples	LW7.5%	61	3	3	4	2	2	5	2	2	2	2	5	5
Ranking chickpea samples	CW7.5%	61	2	3	3	3	2	1	3	3	2	2	5	1				Ranking lentil samples	LS 12.5%	61	2	2	1	3	3	1.5	5	5	3	4	2.5	2
Ranking chickpea samples	CS 12.5%	61	4	4	1.5	1.5	4	3	4	2	3	4	4	3				Ranking lentil samples	LW 12.5%	61	4.5	4.5	3	4	4	3	1	3	5	3	4	4
Ranking chickpea samples	CW 12.5%	61	5	5	1.5	1.5	5	4	5	5	5	5	3	2				Ranking lentil samples	control	61	4.5	4.5	2	1	5	4	4	4	4	5	2.5	1
Ranking chickpea samples	control	42	5	1	5	1	1	5	5	2	1	1	3	3				Ranking lentil samples	LS 7.5%	42	1	1	5	1	1	5	5	1	1	1	4	3
Ranking chickpea samples	CS 7.5%	42	1	2	4	4.5	2	4	4	5	3	3	4.5	4.5				Ranking lentil samples	LW7.5%	42	5	5	3	5	3	2.5	4	2.5	2.5	2	5	5
Ranking chickpea samples	CW7.5%	42	3.5	4.5	1.5	3	3	3	2	4	4	4	1.5	1.5				Ranking lentil samples	LS 12.5%	42	2	2	4	4	2	4	2	4.5	2.5	3	3	4
Ranking chickpea samples	CS 12.5%	42	2	3	3	2	4.5	1	3	1	2	2	4.5	4.5				Ranking lentil samples	LW 12.5%	42	3.5	3.5	2	2.5	4.5	2.5	2	4.5	4.5	4	1.5	1.5
Ranking chickpea samples	CW 12.5%	42	3.5	4.5	1.5	4.5	4.5	2	1	3	5	5	1.5	1.5				Ranking lentil samples	control	42	3.5	3.5	1	2.5	4.5	1	2	2.5	4.5	5	1.5	1.5
Ranking chickpea samples	control	39	1	5	5	5	1	5	1	5	1	1	4	5				Ranking lentil samples	LS 7.5%	39	1	1	5	4	1	5	1	5	1	1	5	5
Ranking chickpea samples	CS 7.5%	39	2	4	4	3	3	3	5	3	2	2	5	4				Ranking lentil samples	LW7.5%	39	3	3	3	3	4	3	5	3	2	2	4	4
Ranking chickpea samples	CW7.5%	39	3	3	3	4	2	4	2	2	3	3	3	3				Ranking lentil samples	LS 12.5%	39	2	2	4	2	2	4	2	2	3	4	2	2
Ranking chickpea samples	CS 12.5%	39	4	2	2	1	5	1	4	1	5	4	2	2				Ranking lentil samples	LW 12.5%	39	5	5	2	1	5	1	3	1	4	3	3	3
Ranking chickpea samples	CW 12.5%	39	5	1	1	2	4	2	3	4	4	5	1	1				Ranking lentil samples	control	39	4	4	1	5	3	2	4	4	5	5	1	1
Ranking chickpea samples	control	38	1	3.5	5	1	1	5	5	1	1	1	4	5				Ranking lentil samples	LS 7.5%	38	1	1	5	5	1	5	4	2	1	1	5	4
Ranking chickpea samples	CS 7.5%	38	2.5	1.5	3	3	2	3	2	4	2	2	5	4				Ranking lentil samples	LW7.5%	38	2	2	3	4	2	4	5	1	2	2	4	5
Ranking chickpea samples	CW7.5%	38	2.5	1.5	4	2	4	4	4	5	3	3	3	2				Ranking lentil samples	LS 12.5%	38	3	3	1	1	3	3	1	5	3	3	3	1
Ranking chickpea samples	CS 12.5%	38	4.5	3.5	2	4	3	1	3	3	4	4	2	1				Ranking lentil samples	LW 12.5%	38	4	4	4	3	4	1	3	3	4	4	2	2
Ranking chickpea samples	CW 12.5%	38	4.5	5	1	5	5	2	1	2	5	5	1	3				Ranking lentil samples	control	38	5	5	2	2	5	2	2	4	5	5	1	3
Ranking chickpea samples	control	14	5	5	5	5	1	5	1	1	1	1	5	4				Ranking lentil samples	LS 7.5%	14	1	1	5	5	1	5	2	1	1	1	1	5
Ranking chickpea samples	CS 7.5%	14	3.5	4	3	4	3	4	4	2.5	3	2	4	5				Ranking lentil samples	LW7.5%	14	2.5	2.5	4	3	3	4	5	3	2	2	3	4
Ranking chickpea samples	CW7.5%	14	3.5	3	4	3	2	3	5	5	2	5	2	3				Ranking lentil samples	LS 12.5%	14	2.5	2.5	1	1	2	2	3	2	3	5	5	1
Ranking chickpea samples	CS 12.5%	14	1	1.5	2	2	4	1.5	3	2.5	4	3	3	2				Ranking lentil samples	LW 12.5%	14	4.5	4.5	2.5	2	4	1	4	4	4	3	4	3
Ranking chickpea samples	CW 12.5%	14	2	1.5	1	1	5	1.5	2	4	5	4	1	1				Ranking lentil samples	control	14	4.5	4.5	2.5	4	5	3	1	5	5	4	2	2
Ranking chickpea samples	control	23	4	1	5	2.5	1.5	5	1.5	1.5	1	1.5	5	4				Ranking lentil samples	LS 7.5%	23	1	1	5	4	1	5	1	1	1	1.5	5	5
Ranking chickpea samples	CS 7.5%	23	1	2.5	3.5	5	1.5	4	1.5	1.5	2	1.5	4	5				Ranking lentil samples	LW7.5%	23	2.5	2.5	3.5	5	2	3.5	5	2.5	2	1.5	4	4
Ranking chickpea samples	CW7.5%	23	2	2.5	3.5	2.5	3.5	3	3	3	3	3	3	2.5				Ranking lentil samples	LS 12.5%	23	2.5	2.5	3.5	3	4.5	3.5	4	2.5	3	3	3	2.5
Ranking chickpea samples	CS 12.5%	23	4	4	2	4	3.5	2	5	4.5	4.5	4.5	1.5	2.5				Ranking lentil samples	LW 12.5%	23	4.5	4.5	1.5	1.5	3	1.5	3	4.5	4.5	4	1.5	2.5
Ranking chickpea samples	CW 12.5%	23	4	5	1	1	5	1	4	4.5	4.5	4.5	1.5	1				Ranking lentil samples	control	23	4.5	4.5	1.5	1.5	4.5	1.5	2	4.5	4.5	5	1.5	1
Ranking chickpea samples	control	35	1	3	5	5	1	5	4	1	1	1	4	4				Ranking lentil samples	LS 7.5%	35	1	1	5	3	1	5	4	1	1	1	1	4
Ranking chickpea samples	CS 7.5%	35	2	1	3	4	2	2	2	3	3	2	5	2				Ranking lentil samples	LW7.5%	35	3	3	4	4	3	3	3	5	2	2	2	5
Ranking chickpea samples	CW7.5%	35	3	2	4	3	3	4	5	5	2	4	3	5				Ranking lentil samples	LS 12.5%	35	2	2	2	2	2	2	5	4	3	4	3	3
Ranking chickpea samples	CS 12.5%	35	5	4	2	1	4	1	1	2	5	3	2	3				Ranking lentil samples	LW 12.5%	35	4	4	3	5	4	1	1	3	5	3	5	2
Ranking chickpea samples	CW 12.5%	35	4	5	1	2	5	3	3	4	4	5	1	1				Ranking lentil samples	control	35	5	5	1	1	5	4	2	2	4	5	4	1
Ranking chickpea samples	control	37	5	5	5	5	5	5	5	5	3	5	5	5				Ranking lentil samples	LS 7.5%	37	1	1	2	3	3	3	4	3	3	3	3	4
Ranking chickpea samples	CS 7.5%	37	2.5	2	1.5	1.5	1	1	1	4	1	2	1	1				Ranking lentil samples	LW7.5%	37	3	3	3	2	2	2	2	2	2	2	2	2
Ranking chickpea samples	CW7.5%	37	2.5	3	1.5	3	3	3	3	2	2	3	2	3				Ranking lentil samples	LS 12.5%	37	2	2	1	1	1	1	3	1	1	1	1	1
Ranking chickpea samples	CS 12.5%	37	1	1	4	1.5	2	2	2	3	5	1	3	2				Ranking lentil samples	LW 12.5%	37	4	4	4	4	4	4	1	4	4	4	4	3
Ranking chickpea samples	CW 12.5%	37	4	4	3	4	4	4	4	1	4	4	4	4				Ranking lentil samples	control	37	5	5	5	5	5	5	5	5	5	5	5	5
Ranking chickpea samples	control	48	5	1	5	5	1	5	1	1	1	1	5	5				Ranking lentil samples	control	48	1	1	5	5	1	5	1	1	1	1	5	5
Ranking chickpea samples	CS 7.5%	48	3	5	4	3	3	4	2	3	2	2	4	3				Ranking lentil samples	LS 7.5%	48	2.5	3	3.5	4	5	4	3	5	2	3	4	2.5
Ranking chickpea samples	CW7.5%	48	3	3	3	4	2	3	4	3	3	3	3	3				Ranking lentil samples	LW7.5%	48	2.5	2	3.5	3	3	1	4	4	4	2	3	2.5
Ranking chickpea samples	CS 12.5%	48	1	3	2	1	5	1	5	5	4	5	2	1				Ranking lentil samples	LS 12.5%	48	4.5	5	1	1	2	2	2	2	4	5	1	2.5
Ranking chickpea samples	CW 12.5%	48	3	3	1	2	4	2	3	3	5	4	1	3				Ranking lentil samples	LW 12.5%	48	4.5	4	2	2	4	3	5	3	4	4	2	2.5
Ranking chickpea samples	control	29	1	1	5	5	1	5	5	5	1	1	5	3				Ranking lentil samples	control	29	1	1	5	2	1	5	1	5	1	1	1	5
Ranking chickpea samples	CS 7.5%	29	3	3	4	3	3	4	4	4	2	2	4	2				Ranking lentil samples	LS 7.5%	29	3	3	4	4	2	1	5	1	2	2	2	4
Ranking chickpea samples	CW7.5%	29	2	2	3	4	2	3	3	1	3	3	3	4				Ranking lentil samples	LW7.5%	29	2	2	3	1	5	3	2	2	3	4	4	2
Ranking chickpea samples	CS 12.5%	29	4	4	2	2	4	2	2	3	4	4	2	5				Ranking lentil samples	LS 12.5%	29	5	5	2	5	3	2	4	4	4	3	3	3
Ranking chickpea samples	CW 12.5%	29	5	5	1	1	5	1	1	2	5	5	1	1				Ranking lentil samples	LW 12.5%	29	4	4	1	3	4	4	3	3	5	5	5	1
Ranking chickpea samples	control	57	2	2	1	2	5	1	5	2	5	1	3	5				Ranking lentil samples	control	57	3	2	1	1	2	5	1	2	4	5	5	2
Ranking chickpea samples	CS 7.5%	57	3	3	4	4	3	3.5	3	4	3	3	1	3				Ranking lentil samples	LS 7.5%	57	5	1	2	2	5	4	3	3.5	5	3	3	1
Ranking chickpea samples	CW7.5%	57	4	4	2	1	4	5	4	1	4	4	4	4				Ranking lentil samples	LW7.5%	57	2	4	4	4	4	3	4	5	1	4	4	4
Ranking chickpea samples	CS 12.5%	57	5	1	3	3	2	2	2	5	1	2	2	2				Ranking lentil samples	LS 12.5%	57	1	3	3	3	1	2	2	1	2	2	2	3
Ranking chickpea samples	CW 12.5%	57	1	5	5	5	1	3.5	1	3	2	5	5	1				Ranking lentil samples	LW 12.5%	57	4	5	5	5	3	1	5	3.5	3	1	1	5
Ranking chickpea samples	control	52	5	1	5	5	1	5	4	4.5	1	1	2	5				Ranking lentil samples	control	52	1	1	5	5	1	5	5	1	1	1	2	5
Ranking chickpea samples	CS 7.5%	52	4	2	4	2	4.5	3	3	2	2.5	2	1	4				Ranking lentil samples	LS 7.5%	52	3	3	3.5	4	2	2.5	1.5	2.5	3	2.5	4	3
Ranking chickpea samples	CW7.5%	52	2.5	3	3	4	2	4	5	4.5	2.5	3	3	2				Ranking lentil samples	LW7.5%	52	4	4	2	1	5	1	4	5	4.5	4.5	3	4
Ranking chickpea samples	CS 12.5%	52	2.5	4.5	2	1	4.5	2	1	3	5	4.5	4.5	1				Ranking lentil samples	LS 12.5%	52	2	2	3.5	2.5	3.5	4	1.5	2.5	2	2.5	1	2
Ranking chickpea samples	CW 12.5%	52	1	4.5	1	3	3	1	2	1	4	4.5	4.5	3				Ranking lentil samples	LW 12.5%	52	5	5	1	2.5	3.5	2.5	3	4	4.5	4.5	5	1
Ranking chickpea samples	control	43	2.5	5	5	5	1	5	5	5	1	1	5	5				Ranking lentil samples	control	43	1	1	5	5	1	5	5	5	1	1	5	5
Ranking chickpea samples	CS 7.5%	43	4	3.5	3.5	4	2	4	2	3	2	2	3.5	3				Ranking lentil samples	LS 7.5%	43	2.5	2.5	3.5	3.5	2.5	4	3.5	3	2.5	3	3.5	2.5
Ranking chickpea samples	CW7.5%	43	5	3.5	3.5	1.5	3	3	3.5	3	3	3	3.5	4				Ranking lentil samples	LW7.5%	43	2.5	2.5	2	3.5	2.5	3	3.5	3	2.5	3	3.5	4
Ranking chickpea samples	CS 12.5%	43	2.5	1.5	2	3	4	1.5	1	1	4.5	4.5	1.5	1.5				Ranking lentil samples	LS 12.5%	43	4.5	4.5	3.5	1.5	4.5	1.5	1.5	3	4.5	3	2	2.5
Ranking chickpea samples	CW 12.5%	43	1	1.5	1	1.5	5	1.5	3.5	3	4.5	4.5	1.5	1.5				Ranking lentil samples	LW 12.5%	43	4.5	4.5	1	1.5	4.5	1.5	1.5	1	4.5	5	1	1
Ranking chickpea samples	control	9	1	1	5	4	1	5	5	1	1	1	1	1				Ranking lentil samples	control	9	1	1	5	5	1	5	5	1	1	1	1	1
Ranking chickpea samples	CS 7.5%	9	2.5	2.5	4	2	2	3.5	4	2	2	2	5	5				Ranking lentil samples	LS 7.5%	9	2.5	2.5	4	2.5	2	4	3	3	2	2	5	5
Ranking chickpea samples	CW7.5%	9	2.5	2.5	3	3	3	3.5	2.5	3	3	4	2.5	4				Ranking lentil samples	LW7.5%	9	2.5	2.5	1	2.5	3	2	4	5	3	4	3	3.5
Ranking chickpea samples	CS 12.5%	9	4.5	4.5	2	1	4	1.5	2.5	4.5	4	3	4	3				Ranking lentil samples	LS 12.5%	9	4.5	4.5	3	2.5	4.5	1	1	2	4	3	4	2
Ranking chickpea samples	CW 12.5%	9	4.5	4.5	1	5	5	1.5	1	4.5	5	5	2.5	2				Ranking lentil samples	LW 12.5%	9	4.5	4.5	2	2.5	4.5	3	2	4	5	5	2	3.5
Ranking chickpea samples	control	46	3	1	1	2	1	4	2	1	1	1	5	5				Ranking lentil samples	control	46	1	1	5	5	1	5	1	1	1	1	5	5
Ranking chickpea samples	CS 7.5%	46	1	2	3	3	4	3	5	5	5	2	4	4				Ranking lentil samples	LS 7.5%	46	3	2	4	2	3	3	4	5	3	3	4	4
Ranking chickpea samples	CW7.5%	46	5	5	5	1	2	1	1	3	4	4	2	2				Ranking lentil samples	LW7.5%	46	2	3	3	1	2	4	2	4	2	2	1	3
Ranking chickpea samples	CS 12.5%	46	2	3	2	4	3	5	4	4	3	3	3	3				Ranking lentil samples	LS 12.5%	46	5	4	2	3	4	1	3	2	4	5	2	2
Ranking chickpea samples	CW 12.5%	46	4	4	4	5	5	2	3	2	2	5	1	1				Ranking lentil samples	LW 12.5%	46	4	5	1	4	5	2	5	3	5	4	3	1
Ranking chickpea samples	control	6	5	1	5	5	1	5	5	3	1	1	5	5				Ranking lentil samples	control	6	1	1	5	5	1	5	1	1	1	4.5	5	5
Ranking chickpea samples	CS 7.5%	6	4	2	4	3.5	2	4	4	3	2	2	4	4				Ranking lentil samples	LS 7.5%	6	3	3	4	3	2	3	3	2	2.5	2	4	4
Ranking chickpea samples	CW7.5%	6	3	3	3	3.5	3	3	2	3	3	3	3	3				Ranking lentil samples	LW7.5%	6	2	2	3	4	3	4	2	4	2.5	3	3	2
Ranking chickpea samples	CS 12.5%	6	2	4.5	2	1.5	4.5	1	2	3	5	4	2	1.5				Ranking lentil samples	LS 12.5%	6	4.5	4.5	2	1	5	2	4	3	4	4.5	1	3
Ranking chickpea samples	CW 12.5%	6	1	4.5	1	1.5	4.5	2	2	3	4	5	1	1.5				Ranking lentil samples	LW 12.5%	6	4.5	4.5	1	2	4	1	5	5	5	1	2	1
Ranking chickpea samples	control	33	5	1	1	1	5	5	4	2	1	1	3	2				Ranking lentil samples	control	33	1	1	5	3	5	5	5	1	1	1	3	2
Ranking chickpea samples	CS 7.5%	33	2	3	2	5	4	3	2	4	2	2	5	5				Ranking lentil samples	control	33	3	2	4	4	4	3	3	4	2.5	2	5	5
Ranking chickpea samples	CW7.5%	33	4	2	3	3	1	2	3	3	3	3	4	3				Ranking lentil samples	LS 7.5%	33	2	3	3	5	3	4	4	3	2.5	4	4	3
Ranking chickpea samples	CS 12.5%	33	3	4	4	2	2	1	5	5	4	4	2	4				Ranking lentil samples	LW7.5%	33	5	5	2	2	1	2	1	2	5	3	2	1
Ranking chickpea samples	CW 12.5%	33	1	5	5	4	3	4	1	1	5	5	1	1				Ranking lentil samples	LS 12.5%	33	4	4	1	1	2	1	2	5	4	5	1	4
Ranking chickpea samples	control	40	5	1	5	5	5	1.5	5	4	1	1	5	1				Ranking lentil samples	LW 12.5%	40	1	1	1	1	1	5	3	5	1	1	5	5
Ranking chickpea samples	CS 7.5%	40	4	2	4	3	3	3	4	3	2	2.5	4	2.5				Ranking lentil samples	control	40	3	2	3	3	2	3	4	4	2	2	4	4
Ranking chickpea samples	CW7.5%	40	3	3	3	2	4	1.5	3	5	3	2.5	3	2.5				Ranking lentil samples	LS 7.5%	40	2	3	2	2	4	4	5	2	3	4	3	3
Ranking chickpea samples	CS 12.5%	40	2	4	2	1	2	4.5	2	2	4	4	2	4.5				Ranking lentil samples	LW7.5%	40	5	5	4.5	5	3	1	1	2	4	3	2	1.5
Ranking chickpea samples	CW 12.5%	40	1	5	1	4	1	4.5	1	1	5	5	1	4.5				Ranking lentil samples	LS 12.5%	40	4	4	4.5	4	5	2	2	2	5	5	1	1.5
Ranking chickpea samples	control	8	5	5	5	1	1	1	5	4	1	1	5	5				Ranking lentil samples	LW 12.5%	8	1	1	5	3	1	1	5	1	1	1	5	5
Ranking chickpea samples	CS 7.5%	8	3.5	3.5	3	2	2.5	2	1	5	2	2	3.5	4				Ranking lentil samples	control	8	2.5	2.5	4	4.5	2.5	4	2	4.5	2	2	3.5	3.5
Ranking chickpea samples	CW7.5%	8	3.5	3.5	3	3	2.5	5	3	1.5	3	3	3.5	2.5				Ranking lentil samples	LS 7.5%	8	2.5	2.5	1	4.5	2.5	4	2	4.5	3	3	3.5	3.5
Ranking chickpea samples	CS 12.5%	8	2	1.5	3	4.5	4.5	3.5	3	1.5	4	4	2	2.5				Ranking lentil samples	LW7.5%	8	4.5	4.5	3	1.5	4.5	4	2	2.5	4.5	4.5	1.5	1.5
Ranking chickpea samples	CW 12.5%	8	1	1.5	1	4.5	4.5	3.5	3	3	5	5	1	1				Ranking lentil samples	LS 12.5%	8	4.5	4.5	2	1.5	4.5	2	4	2.5	4.5	4.5	1.5	1.5
Ranking chickpea samples	control	26	1	5	1	5	1	5	1	3	1	1	5	3				Ranking lentil samples	LW 12.5%	26	1	1	5	3	1	5	1	1	1	1	5	4
Ranking chickpea samples	CS 7.5%	26	2	1	2	1.5	2	4	2	2	2	2	4	5				Ranking lentil samples	control	26	3	3	4	4	3	3	3	4	2	2	4	5
Ranking chickpea samples	CW7.5%	26	4	3	3	4	3	2	4	4	3	4	2	2				Ranking lentil samples	LS 7.5%	26	2	2	2	5	2	4	2	2	3	3	1	3
Ranking chickpea samples	CS 12.5%	26	3	2	4	3	4	3	3	1	4	3	3	4				Ranking lentil samples	LW7.5%	26	5	5	3	1	5	1	5	5	4	4	3	2
Ranking chickpea samples	CW 12.5%	26	5	4	5	1.5	5	1	5	5	5	5	1	1				Ranking lentil samples	LS 12.5%	26	4	4	1	2	4	2	4	3	5	5	2	1
Ranking chickpea samples	control	24	5	3	5	5	1	5	3	1	1	1	5	1				Ranking lentil samples	LW 12.5%	24	1	1	5	5	1	5	5	1	1	1	5	3
Ranking chickpea samples	CS 7.5%	24	3.5	3	3.5	3.5	3	3.5	3	3.5	2	2.5	4	2				Ranking lentil samples	control	24	2.5	2.5	4	4	2	3.5	2.5	3.5	2	2.5	4	5
Ranking chickpea samples	CW7.5%	24	3.5	3	1.5	3.5	2	3.5	3	3.5	3	4.5	2	4				Ranking lentil samples	LS 7.5%	24	2.5	2.5	3	3	3	3.5	2.5	3.5	3	4.5	3	2
Ranking chickpea samples	CS 12.5%	24	1.5	3	3.5	1.5	4	1.5	3	3.5	4	2.5	3	4				Ranking lentil samples	LW7.5%	24	4.5	4.5	2	1.5	4	1.5	2.5	3.5	4	2.5	2	4
Ranking chickpea samples	CW 12.5%	24	1.5	3	1.5	1.5	5	1.5	3	3.5	5	4.5	1	4				Ranking lentil samples	LS 12.5%	24	4.5	4.5	1	1.5	5	1.5	2.5	3.5	5	4.5	1	1
Ranking chickpea samples	control	4	1	1	5	1	1	5	1	1	1	1	1	5				Ranking lentil samples	LW 12.5%	4	1	1	5	5	1	1	5	1.5	1	1	1	1
Ranking chickpea samples	CS 7.5%	4	2	2	4	4	4.5	4	5	4	2	2	4	2				Ranking lentil samples	control	4	3	3	3	3	3	3	3	3	3	2.5	4	4
Ranking chickpea samples	CW7.5%	4	3	3	3	5	4.5	2	3	3	3	3	5	1				Ranking lentil samples	LS 7.5%	4	2	2	4	4	2	2	4	1.5	2	2.5	5	5
Ranking chickpea samples	CS 12.5%	4	4.5	4.5	1	2.5	2.5	2	3	2	4	4.5	2.5	3.5				Ranking lentil samples	LW7.5%	4	4.5	5	1.5	1.5	5	5	1	5	5	4.5	3	2
Ranking chickpea samples	CW 12.5%	4	4.5	4.5	2	2.5	2.5	2	3	5	5	4.5	2.5	3.5				Ranking lentil samples	LS 12.5%	4	4.5	4	1.5	1.5	4	4	2	4	4	4.5	2	3
Ranking chickpea samples	control	58	2	2	5	2	3	1	3	3	1	1.5	5	3				Ranking lentil samples	LW 12.5%	58	1	1	5	1	1	1	2	2.5	1	1	3.5	3
Ranking chickpea samples	CS 7.5%	58	2	2	3	1	1	2	3	3	2	1.5	3	2				Ranking lentil samples	control	58	3	3	3	2.5	2	2.5	2	1	3	2	1	5
Ranking chickpea samples	CW7.5%	58	2	2	4	3	2	3	3	3	3	3	3	1				Ranking lentil samples	LS 7.5%	58	2	2	4	2.5	3	2.5	2	2.5	2	3	3.5	4
Ranking chickpea samples	CS 12.5%	58	4	4	2	4	4	4	3	3	4	4	3	4				Ranking lentil samples	LW7.5%	58	4	5	2	4	4	4.5	4.5	4	4.5	4	5	2
Ranking chickpea samples	CW 12.5%	58	5	5	1	5	5	5	3	3	5	5	1	5				Ranking lentil samples	LS 12.5%	58	5	4	1	5	5	4.5	4.5	5	4.5	5	2	1
Ranking chickpea samples	control	31	5	1	5	5	1	5	1	5	1	1	5	3				Ranking lentil samples	LW 12.5%	31	1	1	1	5	1	5	5	5	1	1	5	3
Ranking chickpea samples	CS 7.5%	31	1.5	3	4	2	2	3	2	3	2	2	3	1				Ranking lentil samples	control	31	4	3.5	2	4	2	4	1	3	2	2	4	1
Ranking chickpea samples	CW7.5%	31	1.5	2	3	3	5	4	4	1	3	4	2	4				Ranking lentil samples	LS 7.5%	31	2.5	2	3	3	3	3	4	4	3	3	3	2
Ranking chickpea samples	CS 12.5%	31	3.5	5	2	1	3	1	3	4	4	3	4	5				Ranking lentil samples	LW7.5%	31	5	5	5	1	5	1	3	1	5	5	1	5
Ranking chickpea samples	CW 12.5%	31	3.5	4	1	4	4	2	5	2	5	5	1	2				Ranking lentil samples	LS 12.5%	31	2.5	3.5	4	2	4	2	2	2	4	4	2	4
Ranking chickpea samples	control	7	4.5	1	5	5	1	1.5	5	5	1	1	1	3				Ranking lentil samples	LW 12.5%	7	1	1	1	1	1	1	1	1	1	1	1	3
Ranking chickpea samples	CS 7.5%	7	4.5	2	3	3	2.5	3.5	3	3	2.5	2	2.5	2				Ranking lentil samples	control	7	3	2	2	2	2	2	3	4	2	2	2.5	5
Ranking chickpea samples	CW7.5%	7	3	3	4	4	2.5	3.5	4	4	2.5	5	2.5	4				Ranking lentil samples	control	7	2	3	5	3	3	4.5	2	2	3	4	2.5	4
Ranking chickpea samples	CS 12.5%	7	1.5	5	1	2	4.5	5	2	1.5	4	3	4.5	1				Ranking lentil samples	LS 7.5%	7	5	5	3	5	5	3	4	3	5	3	4	1
Ranking chickpea samples	CW 12.5%	7	1.5	4	2	1	4.5	1.5	1	1.5	5	4	4.5	5				Ranking lentil samples	LW7.5%	7	4	4	4	4	4	4.5	5	5	4	5	5	2
Ranking chickpea samples	control	5	5	1	5	5	5	5	1.5	3	1	1	1	4				Ranking lentil samples	LS 12.5%	5	1	1	5	5	1	5	1	2	1	1	1	5
Ranking chickpea samples	CS 7.5%	5	3.5	3.5	3.5	2.5	2.5	4	4.5	3	2	2	2	4				Ranking lentil samples	LW 12.5%	5	2.5	2.5	3.5	1.5	2.5	3.5	2.5	4	3	2.5	2.5	4
Ranking chickpea samples	CW7.5%	5	3.5	3.5	3.5	2.5	2.5	2	4.5	3	3	3	3	4				Ranking lentil samples	control	5	2.5	2.5	3.5	3.5	2.5	3.5	2.5	5	2	2.5	2.5	2.5
Ranking chickpea samples	CS 12.5%	5	1.5	3.5	2	2.5	2.5	2	3	3	4	4	4	1.5				Ranking lentil samples	LS 7.5%	5	4.5	4.5	1.5	3.5	4.5	1.5	4.5	2	4.5	4	4.5	2.5
Ranking chickpea samples	CW 12.5%	5	1.5	3.5	1	2.5	2.5	2	1.5	3	5	5	5	1.5				Ranking lentil samples	LW7.5%	5	4.5	4.5	1.5	1.5	4.5	1.5	4.5	2	4.5	5	4.5	1
Ranking chickpea samples	control	3	1	1	5	1	2.5	3.5	1	1	1	1	4	1.5				Ranking lentil samples	LS 12.5%	3	1	1	1	1	1	5	4	1	1	1	3	3
Ranking chickpea samples	CS 7.5%	3	2	2	4	5	5	5	2	2	2	2	5	3.5				Ranking lentil samples	LW 12.5%	3	3	2	3	4.5	2.5	3	3	5	3	3	4.5	4
Ranking chickpea samples	CW7.5%	3	3	3	3	2	2.5	1	3.5	5	3	5	3	1.5				Ranking lentil samples	control	3	2	3	2	4.5	2.5	4	5	4	2	2	4.5	5
Ranking chickpea samples	CS 12.5%	3	4.5	4.5	2	3.5	2.5	3.5	5	4	4.5	3	1.5	3.5				Ranking lentil samples	LS 7.5%	3	5	5	4.5	2.5	4.5	1	1.5	3	5	4	1.5	2
Ranking chickpea samples	CW 12.5%	3	4.5	4.5	1	3.5	2.5	2	3.5	3	4.5	4	1.5	5				Ranking lentil samples	LW7.5%	3	4	4	4.5	2.5	4.5	2	1.5	2	4	5	1.5	1

## Sheet: Elderly Consumers
Puree sample (control=no enrichment; lentil=enriched with lentil powder; chickpea=enriched with chickpea powder)	Panelist_Code	Acceptability (1-9)	Helathy (5 point scale)	Willingnest to eat for dinner (5 point)	Hunger (7 point)	Satiety (7 points)	Gender (man=1;woman =0)	Age	Protein concerned (No, YES)	Fibra concerned (NO, YES)	Panelist_Code	PK Chicken (Correct 1; Failed 0)	PK CHEESE (Correct 1; Failed 0)	PK Fruit (Correct 1; Failed 0)	PK lentil, chickpea (Correct 1; Failed 0)	PK butter (Correct 1; Failed 0)	PK cream (Correct 1; Failed 0)	Protein Content Knowledge Sum	Knowledge of relevance of protein in diet 1 (Correct 1; Failed 0)	Knowledge of relevance of protein in diet 2 (Correct 1; Failed 0)	Knowledge of relevance of protein in diet 3 (Correct 1; Failed 0)	Knowledge of relevance of protein in diet 4 (Correct 1; Failed 0)	Protein Relevance Sum	SCORE Protein Knowledge	RNeo1	Neo2	Neo3	RNeo4	Neo5	RNeo6	Neo7	Neo8	RNeo9	RNeo10	SCORE NEOPHOBIA
Control	1	8	4	5	5	6	0	62	NO	NO	1	1	1	1	1	1	1	6	1	0	1	0	2	7.5	2	1	5	3	2	2	3	4	3	2	2.7
Control	2	8	4	5	2	2	0	63	NO	NO	2	0	1	1	0	0	0	2	0	0	1	0	1	2.91667	2	2	3	2	4	5	3	2	6	2	3.1
Control	3	8	4	4	3	6	1	70	YES	YES	3	0	1	0	1	1	1	4	1	0	1	1	3	7.08333	5	2	6	3	4	4	2	1	6	5	3.8
Control	4	7	4	4	5	3	0	68	NO	NO	4	0	1	0	0	0	0	1	1	0	0	0	1	2.08333	3	1	7	2	5	2	4	7	7	1	3.9
Control	5	7	3	3	4	6	0	68	YES	YES	5	1	0	1	1	1	1	5	0	0	1	0	1	5.41667	2	2	2	2	1	2	2	2	3	2	2
Control	6	7	5	4	1	1	1	63	NO	NO	6	1	1	1	0	0	1	4	0	0	1	1	2	5.83333	2	2	2	2	4	2	1	2	6	2	2.5
Control	7	5	3	4	4	1	1	73	NO	NO	7	1	1	1	0	0	0	3	0	1	1	1	3	6.25	1	1	1	1	1	1	1	1	1	1	1
Control	8	7	3	4	1	1	1	73	YES	YES	8	1	0	1	1	1	1	5	1	1	1	0	3	7.91667	2	6	6	2	6	3	3	4	5	3	4
Control	9	6	4	4	6	6	0	69	NO	NO	9	1	1	0	1	1	1	5	1	0	1	1	3	7.91667	1	1	1	1	3	1	1	5	7	2	2.3
Control	10	7	4	4	4	3	0	66	NO	YES	10	0	0	1	0	0	0	1	0	1	1	0	2	3.33333	2	3	6	2	1	2	2	3	2	2	2.5
Control	11	7	4	4	6	7	0	68	NO	YES	11	1	0	0	1	1	1	4	0	1	1	0	2	5.83333	1	1	5	3	1	2	1	3	7	2	2.6
Control	12	8	4	4	5	3	0	68	YES	YES	12	1	1	1	1	1	1	6	1	0	1	1	3	8.75	4	4	6	2	2	3	2	4	7	2	3.6
Control	13	8	4	5	5	7	0	73	YES	YES	13	0	1	0	1	0	0	2	1	1	1	1	4	6.66667	5	5	3	2	5	3	4	6	4	3	4
Control	14	8	4	4	5	4	0	74	YES	YES	14	1	0	1	1	1	1	5	0	0	1	0	1	5.41667	5	4	5	3	4	3	4	3	5	5	4.1
Control	15	8	5	4	5	5	0	69	NO	NO	15	0	1	1	1	1	1	5	1	1	1	1	4	9.16667	5	4	3	3	3	3	3	4	5	4	3.7
Control	16	8	4	5	3	6	0	61	YES	YES	16	1	1	1	1	1	1	6	1	0	1	1	3	8.75	2	1	3	1	1	1	1	1	3	1	1.5
Control	17	8	4	4	6	2	1	67	NO	NO	17	1	0	0	1	1	1	4	1	0	1	1	3	7.08333	3	2	2	3	3	2	2	1	2	3	2.3
Control	18	8	5	5	4	4	0	63	YES	YES	18	0	1	1	1	0	0	3	0	0	1	0	1	3.75	2	3	4	2	4	2	3	5	2	1	2.8
Control	19	7	4	5	5	7	1	80	NO	YES	19	0	0	1	0	0	0	1	0	1	1	1	3	4.58333	4	4	6	2	6	2	2	6	5	4	4.1
Control	20	8	4	4	4	6	0	79	NO	YES	20	0	0	1	1	0	0	2	1	1	1	0	3	5.41667	7	4	5	3	4	2	4	1	3	2	3.5
Control	21	4	3	3	4	5	0	70	NO	NO	21	1	1	1	1	1	1	6	0	0	1	0	1	6.25	1	1	3	2	1	2	1	5	4	2	2.2
Control	22	9	4	5	4	6	0	64	YES	YES	22	1	1	1	1	1	1	6	1	0	1	0	2	7.5	2	2	2	1	1	2	1	1	1	1	1.4
Control	23	8	4	4	4	3	0	63	YES	YES	23	1	0	1	1	1	1	5	0	0	1	1	2	6.66667	6	3	3	1	3	2	2	6	7	2	3.5
Control	24	7	4	4	2	4	0	66	YES	YES	24	1	0	1	0	1	0	3	0	1	0	1	2	5	4	2	2	2	2	2	2	2	6	2	2.6
Control	25	8	4	5	1	7	0	65	NO	NO	25	1	0	0	1	1	1	4	1	1	1	0	3	7.08333	3	1	1	1	1	1	1	2	3	2	1.6
Control	26	8	4	4	2	6	0	62	YES	YES	26	1	0	0	1	1	1	4	1	1	1	1	4	8.33333	3	1	2	3	2	2	1	4	6	2	2.6
Control	27	6	5	5	7	5	1	73	YES	YES	27	1	0	0	1	0	0	2	0	0	1	0	1	2.91667	2	2	2	2	2	2	2	2	5	2	2.3
Control	28	7	4	5	2	7	0	71	YES	YES	28	0	1	0	1	1	1	4	0	1	1	1	3	7.08333	1	1	4	1	7	1	3	7	7	1	3.3
Control	29	8	4	4	7	2	1	63	NO	NO	29	0	1	1	1	0	0	3	0	0	1	0	1	3.75	4	2	2	2	2	2	2	2	5	2	2.5
Control	30	8	4	4	1	7	1	66	YES	YES	30	1	1	1	1	1	0	5	1	1	1	1	4	9.16667	4	1	1	1	1	1	1	2	2	1	1.5
Control	31	7	2	3	3	5	1	67	NO	YES	31	1	0	1	1	0	0	3	0	0	1	1	2	5	3	4	4	3	4	3	5	4	3	5	3.8
Control	32	5	4	3	3	3	0	63	NO	YES	32	1	0	1	0	0	0	2	1	0	0	1	2	4.16667	7	7	7	4	4	7	7	5	7	2	5.7
Control	33	8	5	5	5	3	1	68	YES	YES	33	1	1	0	1	0	0	3	1	0	1	1	3	6.25	2	2	7	1	2	1	1	6	7	1	3
Control	34	8	2	3	4	1	0	68	YES	YES	34	1	1	1	1	1	1	6	1	0	1	0	2	7.5	1	3	3	1	6	5	4	5	5	1	3.4
Control	35	6	4	4	5	2	1	61	YES	YES	35	1	0	1	1	1	1	5	1	1	1	1	4	9.16667	1	1	1	1	1	1	1	1	1	1	1
Control	36	8	4	5	4	5	1	64	YES	YES	36	1	1	1	0	1	1	5	1	0	1	1	3	7.91667	3	2	3	2	2	1	2	3	3	2	2.3
Control	37	8	4	5	5	5	0	60	YES	NO	37	1	0	0	1	0	0	2	1	0	1	1	3	5.41667	2	2	3	2	3	2	6	3	3	2	2.8
Control	38	9	5	5	1	7	0	70	YES	YES	38	0	1	1	1	1	0	4	1	0	1	1	3	7.08333	2	1	1	1	1	1	1	6	2	1	1.7
Control	39	5	3	3	5	3	1	76	NO	YES	39	1	1	1	1	0	0	4	0	0	1	0	1	4.58333	4	5	4	4	4	3	4	6	6	4	4.4
Control	40	7	4	4	1	6	0	67	NO	NO	40	1	1	1	1	1	1	6	1	1	1	1	4	10	5	2	2	4	3	3	5	6	6	3	3.9
Control	41	7	5	4	1	7	1	71	YES	YES	41	1	1	1	1	1	1	6	0	1	1	0	2	7.5	5	2	7	2	6	5	5	5	7	5	4.9
Control	42	8	4	5	5	3	0	66	NO	NO	42	1	1	1	1	1	1	6	1	1	1	1	4	10	4	2	6	2	1	2	1	4	5	2	2.9
Control	43	7	4	3	5	3	1	67	NO	NO	43	0	0	1	1	0	0	2	1	0	1	1	3	5.41667	5	3	3	3	3	3	2	2	5	3	3.2
Control	44	9	4	5	1	1	1	67	YES	YES	44	1	1	1	1	0	1	5	0	0	1	0	1	5.41667	5	3	3	3	3	5	3	1	5	7	3.8
Control	45	8	5	5	5	4	0	64	NO	NO	45	1	1	1	1	0	0	4	0	0	1	1	2	5.83333	5	1	2	1	2	1	1	3	2	1	1.9
Control	46	8	4	5	2	5	0	75	YES	YES	46	1	1	1	1	1	1	6	1	0	1	1	3	8.75	2	3	3	1	1	2	1	4	5	1	2.3
Control	47	8	5	4	3	6	0	61	NO	NO	47	1	1	1	1	0	0	4	1	0	1	1	3	7.08333	5	3	5	2	2	2	2	5	7	2	3.5
Control	48	7	5	5	2	3	1	60	NO	NO	48	0	0	0	0	0	0	0	1	0	1	1	3	3.75	6	4	3	5	4	3	5	2	6	5	4.3
Control	49	9	5	5	1	7	0	60	NO	YES	49	1	0	0	1	1	1	4	1	0	1	1	3	7.08333	6	2	2	3	6	2	2	2	2	3	3
Control	50	8	4	5	5	3	0	66	NO	NO	50	1	1	1	1	0	1	5	0	0	1	1	2	6.66667	6	3	1	4	3	1	2	3	4	6	3.3
Control	51	8	4	4	1	6	1	68	NO	NO	51	1	1	1	0	0	0	3	0	0	1	0	1	3.75	6	2	6	6	2	2	2	6	6	6	4.4
Control	52	7	4	5	5	3	0	69	NO	YES	52	0	0	1	0	0	0	1	1	0	1	0	2	3.33333	3	7	3	2	3	3	7	3	5	2	3.8
Control	53	7	3	4	5	6	0	66	YES	YES	53	0	0	0	1	1	1	3	1	0	1	1	3	6.25	1	4	6	2	5	3	3	3	5	3	3.5
Control	54	8	3	3	2	6	1	65	NO	NO	54	1	1	1	1	0	0	4	1	0	1	0	2	5.83333	4	1	3	2	1	1	2	2	6	2	2.4
Control	55	7	4	4	5	6	0	72	YES	YES	55	1	1	1	1	0	0	4	0	1	1	1	3	7.08333	3	5	5	2	3	2	5	5	3	2	3.5
Control	56	8	4	5	4	4	0	71	YES	YES	56	1	0	1	1	1	1	5	1	1	1	0	3	7.91667	3	1	2	2	2	1	2	5	7	3	2.8
Control	57	8	5	5	4	6	0	73	YES	YES	57	1	1	1	1	0	0	4	1	0	1	0	2	5.83333	4	1	4	1	1	1	4	1	4	1	2.2
Control	58	7	3	4	4	6	0	66	NO	YES	58	0	0	0	1	0	0	1	0	0	1	0	1	2.08333	3	5	5	3	5	3	6	5	2	2	3.9
Control	59	8	4	4	5	7	1	68	NO	NO	59	1	0	1	1	1	1	5	0	0	1	0	1	5.41667	2	2	2	2	2	2	2	2	2	2	2
Control	60	8	5	5	5	6	0	78	YES	YES	60	0	1	1	0	0	0	2	1	1	1	0	3	5.41667	3	4	3	4	2	1	5	6	6	1	3.5
Control	61	8	4	5	2	6	1	66	YES	YES	61	1	1	1	1	1	1	6	0	1	0	0	1	6.25	5	4	3	2	2	2	2	6	2	2	3
Control	62	8	4	5	4	4	1	72	NO	NO	62	1	0	0	1	1	1	4	1	0	1	0	2	5.83333	1	2	3	1	2	1	7	4	2	1	2.4
Control	63	8	4	4	3	6	0	66	NO	NO	63	1	1	0	0	0	0	2	0	0	1	1	2	4.16667	4	2	2	2	3	2	1	1	3	2	2.2
Control	64	8	5	5	3	6	1	65	NO	YES	64	1	1	1	1	0	0	4	1	1	1	1	4	8.33333	3	5	1	1	2	1	7	6	6	1	3.3
Control	65	8	4	4	1	6	0	64	YES	YES	65	1	1	1	1	0	0	4	1	1	1	1	4	8.33333	6	2	3	2	1	1	2	5	3	7	3.2
Control	66	7	4	5	2	4	1	67	YES	YES	66	1	0	1	0	0	0	2	0	0	1	1	2	4.16667	3	5	3	1	2	2	1	3	1	1	2.2
Control	67	8	5	5	6	2	0	78	YES	YES	67	1	0	1	1	1	1	5	1	1	1	0	3	7.91667	2	6	1	2	1	1	2	7	4	2	2.8
Control	68	8	4	5	5	6	1	66	YES	NO	68	1	0	0	1	0	1	3	1	0	1	1	3	6.25	2	2	2	1	2	1	1	6	1	1	1.9
Control	69	5	4	3	5	3	1	67	NO	YES	69	1	1	1	1	1	1	6	1	1	1	1	4	10	3	1	3	2	5	3	1	6	7	3	3.4
Control	70	7	4	4	2	1	1	76	YES	NO	70	0	1	1	1	0	0	3	0	1	1	0	2	5	5	5	6	5	3	5	5	7	7	7	5.5
Control	71	8	4	5	5	1	1	67	YES	YES	71	0	1	1	0	0	0	2	1	0	1	1	3	5.41667	6	4	6	4	4	2	3	6	4	6	4.5
Control	72	8	4	4	7	3	1	68	YES	YES	72	1	0	1	0	0	0	2	0	0	1	1	2	4.16667	3	4	3	2	2	2	2	2	4	2	2.6
Control	73	8	4	5	6	2	1	64	NO	NO	73	0	1	1	1	0	0	3	1	0	1	1	3	6.25	4	1	1	1	1	1	1	1	4	1	1.6
Control	74	7	4	4	1	4	1	66	NO	NO	74	1	0	1	1	1	1	5	0	1	1	1	3	7.91667	3	3	1	1	1	2	1	3	5	1	2.1
Control	75	7	4	4	1	7	1	67	NO	NO	75	1	0	0	1	1	1	4	1	1	1	1	4	8.33333	2	2	1	2	3	1	1	3	3	1	1.9
Control	76	4	3	1	4	5	1	64	NO	NO	76	1	1	1	0	0	0	3	1	1	1	1	4	7.5	5	3	5	3	5	2	2	4	4	4	3.7
Control	77	7	4	4	5	4	1	66	YES	NO	77	1	1	1	1	0	0	4	1	1	1	1	4	8.33333	4	4	2	1	1	4	5	6	7	1	3.5
Control	78	7	3	2	1	6	1	71	YES	YES	78	1	0	0	0	0	1	2	1	0	1	1	3	5.41667	7	4	7	4	1	5	6	7	6	5	5.2
Control	79	9	5	4	2	6	0	65	NO	NO	79	1	0	1	1	1	1	5	1	0	1	0	2	6.66667	5	2	6	2	2	5	5	2	6	1	3.6
Control	80	8	5	5	6	2	1	66	NO	NO	80	1	1	1	1	0	0	4	0	1	1	0	2	5.83333	1	1	1	1	1	1	1	4	2	1	1.4
Control	81	7	4	4	3	6	1	66	NO	NO	81	1	0	1	1	0	0	3	0	1	1	1	3	6.25	3	3	2	3	3	3	3	6	3	2	3.1
Control	82	7	4	4	5	7	0	65	NO	NO	82	1	0	1	1	1	1	5	1	0	1	1	3	7.91667	3	3	2	2	3	1	5	6	6	2	3.3
Control	83	9	4	5	3	7	1	60	YES	YES	83	1	1	1	1	1	0	5	1	0	1	1	3	7.91667	3	1	1	1	1	1	1	1	1	2	1.3
Control	84	7	4	5	2	7	1	63	NO	NO	84	1	0	0	1	1	1	4	0	0	1	0	1	4.58333	1	2	7	2	1	2	7	3	7	1	3.3
Control	85	3	4	4	6	5	1	62	NO	YES	85	0	1	1	0	0	0	2	1	1	1	0	3	5.41667	4	2	2	2	2	2	2	4	5	2	2.7
Control	86	7	4	4	3	3	1	68	NO	NO	86	1	0	1	1	1	1	5	0	1	1	1	3	7.91667	6	4	5	5	5	3	3	5	5	5	4.6
Control	87	8	5	5	3	3	1	64	NO	NO	87	0	1	1	1	0	0	3	0	0	1	0	1	3.75	4	2	1	1	1	7	1	6	5	2	3
Control	88	8	4	4	2	1	1	71	NO	NO	88	1	0	0	1	1	1	4	1	0	1	0	2	5.83333	6	2	2	2	2	1	2	6	2	1	2.6
Control	89	5	3	3	2	5	1	63	NO	NO	89	1	0	0	1	1	1	4	0	1	1	0	2	5.83333	4	4	5	4	3	3	2	3	4	5	3.7
Control	90	8	5	5	7	1	1	69	YES	YES	90	1	1	1	1	0	0	4	1	1	1	1	4	8.33333	3	4	4	3	3	3	3	4	7	4	3.8
Control	91	8	4	4	5	3	1	63	NO	NO	91	0	0	1	1	0	0	2	1	0	1	0	2	4.16667	2	4	2	2	3	2	2	3	2	3	2.5
Control	92	7	4	3	6	1	0	78	YES	YES	92	1	0	1	1	1	1	5	1	1	1	1	4	9.16667	1	1	1	1	5	1	1	3	7	1	2.2
Control	93	8	4	4	2	2	0	69	NO	NO	93	1	0	1	1	1	1	5	1	0	1	1	3	7.91667	5	2	1	2	2	2	1	1	2	2	2
Control	94	7	4	5	7	2	0	70	YES	YES	94	0	1	1	1	0	0	3	0	1	1	1	3	6.25	5	4	7	2	5	3	6	3	6	3	4.4
Control	95	7	4	4	5	2	1	70	NO	NO	95	1	1	1	0	0	0	3	0	0	1	0	1	3.75	5	2	3	2	5	2	2	3	3	3	3
Control	96	6	3	2	7	2	0	70	NO	NO	96	1	1	1	1	0	0	4	1	1	1	1	4	8.33333	6	5	7	2	5	2	5	6	7	3	4.8
Control	97	7	4	5	2	3	1	64	YES	YES	97	1	1	1	1	1	1	6	1	0	1	1	3	8.75	5	3	3	3	2	2	2	2	3	3	2.8
Control	98	5	4	3	3	6	1	65	NO	NO	98	0	1	1	0	0	0	2	1	1	1	0	3	5.41667	4	5	6	3	2	2	2	4	4	2	3.4
Control	99	8	4	3	3	3	1	64	NO	NO	99	1	0	1	0	1	1	4	0	0	1	0	1	4.58333	2	2	2	2	2	4	2	2	3	2	2.3
Control	100	9	5	5	7	7	0	72	YES	YES	100	1	1	1	1	1	1	6	1	1	1	1	4	10	3	3	3	3	3	7	5	3	6	2	3.8
Control	101	8	5	5	1	7	0	70	NO	YES	101	1	0	1	0	0	1	3	0	1	1	0	2	5	3	4	2	2	5	3	6	7	7	3	4.2
Control	102	7	4	4	3	3	0	60	NO	NO	102	1	1	1	1	1	1	6	1	1	1	1	4	10	2	6	5	1	6	1	4	6	5	1	3.7
Chickpea	1	8	4	5	1	7	0	62	NO	NO	1	1	1	1	1	1	1	6	1	0	1	0	2	7.5	2	1	5	3	2	2	3	4	3	2	2.7
Chickpea	2	7	4	4	2	6	0	63	NO	NO	2	0	1	1	0	0	0	2	0	0	1	0	1	2.91667	2	2	3	2	4	5	3	2	6	2	3.1
Chickpea	3	8	4	4	2	6	1	70	YES	YES	3	0	1	0	1	1	1	4	1	0	1	1	3	7.08333	5	2	6	3	4	4	2	1	6	5	3.8
Chickpea	4	6	3	3	4	4	0	68	NO	NO	4	0	1	0	0	0	0	1	1	0	0	0	1	2.08333	3	1	7	2	5	2	4	7	7	1	3.9
Chickpea	5	7	5	4	2	6	0	68	YES	YES	5	1	0	1	1	1	1	5	0	0	1	0	1	5.41667	2	2	2	2	1	2	2	2	3	2	2
Chickpea	6	1	5	5	1	7	1	63	NO	NO	6	1	1	1	0	0	1	4	0	0	1	1	2	5.83333	2	2	2	2	4	2	1	2	6	2	2.5
Chickpea	7	6	3	4	7	1	1	73	NO	NO	7	1	1	1	0	0	0	3	0	1	1	1	3	6.25	1	1	1	1	1	1	1	1	1	1	1
Chickpea	8	8	4	4	6	6	1	73	YES	YES	8	1	0	1	1	1	1	5	1	1	1	0	3	7.91667	2	6	6	2	6	3	3	4	5	3	4
Chickpea	9	8	4	4	5	7	0	69	NO	NO	9	1	1	0	1	1	1	5	1	0	1	1	3	7.91667	1	1	1	1	3	1	1	5	7	2	2.3
Chickpea	10	6	3	4	3	5	0	66	NO	YES	10	0	0	1	0	0	0	1	0	1	1	0	2	3.33333	2	3	6	2	1	2	2	3	2	2	2.5
Chickpea	11	9	5	5	6	7	0	68	NO	YES	11	1	0	0	1	1	1	4	0	1	1	0	2	5.83333	1	1	5	3	1	2	1	3	7	2	2.6
Chickpea	12	8	4	4	5	4	0	68	YES	YES	12	1	1	1	1	1	1	6	1	0	1	1	3	8.75	4	4	6	2	2	3	2	4	7	2	3.6
Chickpea	13	8	3	5	3	7	0	73	YES	YES	13	0	1	0	1	0	0	2	1	1	1	1	4	6.66667	5	5	3	2	5	3	4	6	4	3	4
Chickpea	14	8	5	5	3	6	0	74	YES	YES	14	1	0	1	1	1	1	5	0	0	1	0	1	5.41667	5	4	5	3	4	3	4	3	5	5	4.1
Chickpea	15	7	4	4	6	4	0	69	NO	NO	15	0	1	1	1	1	1	5	1	1	1	1	4	9.16667	5	4	3	3	3	3	3	4	5	4	3.7
Chickpea	16	8	5	5	2	7	0	61	YES	YES	16	1	1	1	1	1	1	6	1	0	1	1	3	8.75	2	1	3	1	1	1	1	1	3	1	1.5
Chickpea	17	8	4	4	5	3	1	67	NO	NO	17	1	0	0	1	1	1	4	1	0	1	1	3	7.08333	3	2	2	3	3	2	2	1	2	3	2.3
Chickpea	18	8	5	5	4	4	0	63	YES	YES	18	0	1	1	1	0	0	3	0	0	1	0	1	3.75	2	3	4	2	4	2	3	5	2	1	2.8
Chickpea	19	7	4	5	5	7	1	80	NO	YES	19	0	0	1	0	0	0	1	0	1	1	1	3	4.58333	4	4	6	2	6	2	2	6	5	4	4.1
Chickpea	20	7	4	4	4	6	0	79	NO	YES	20	0	0	1	1	0	0	2	1	1	1	0	3	5.41667	7	4	5	3	4	2	4	1	3	2	3.5
Chickpea	21	7	4	4	5	6	0	70	NO	NO	21	1	1	1	1	1	1	6	0	0	1	0	1	6.25	1	1	3	2	1	2	1	5	4	2	2.2
Chickpea	22	9	5	5	4	6	0	64	YES	YES	22	1	1	1	1	1	1	6	1	0	1	0	2	7.5	2	2	2	1	1	2	1	1	1	1	1.4
Chickpea	23	7	5	4	4	6	0	63	YES	YES	23	1	0	1	1	1	1	5	0	0	1	1	2	6.66667	6	3	3	1	3	2	2	6	7	2	3.5
Chickpea	24	5	3	2	5	5	0	66	YES	YES	24	1	0	1	0	1	0	3	0	1	0	1	2	5	4	2	2	2	2	2	2	2	6	2	2.6
Chickpea	25	7	4	5	1	7	0	65	NO	NO	25	1	0	0	1	1	1	4	1	1	1	0	3	7.08333	3	1	1	1	1	1	1	2	3	2	1.6
Chickpea	26	8	4	5	1	7	0	62	YES	YES	26	1	0	0	1	1	1	4	1	1	1	1	4	8.33333	3	1	2	3	2	2	1	4	6	2	2.6
Chickpea	27	8	5	5	2	6	1	73	YES	YES	27	1	0	0	1	0	0	2	0	0	1	0	1	2.91667	2	2	2	2	2	2	2	2	5	2	2.3
Chickpea	28	1	5	5	1	7	0	71	YES	YES	28	0	1	0	1	1	1	4	0	1	1	1	3	7.08333	1	1	4	1	7	1	3	7	7	1	3.3
Chickpea	29	7	4	4	5	5	1	63	NO	NO	29	0	1	1	1	0	0	3	0	0	1	0	1	3.75	4	2	2	2	2	2	2	2	5	2	2.5
Chickpea	30	7	4	4	1	7	1	66	YES	YES	30	1	1	1	1	1	0	5	1	1	1	1	4	9.16667	4	1	1	1	1	1	1	2	2	1	1.5
Chickpea	31	4	3	3	3	5	1	67	NO	YES	31	1	0	1	1	0	0	3	0	0	1	1	2	5	3	4	4	3	4	3	5	4	3	5	3.8
Chickpea	32	5	3	1	4	3	0	63	NO	YES	32	1	0	1	0	0	0	2	1	0	0	1	2	4.16667	7	7	7	4	4	7	7	5	7	2	5.7
Chickpea	33	8	5	5	5	3	1	68	YES	YES	33	1	1	0	1	0	0	3	1	0	1	1	3	6.25	2	2	7	1	2	1	1	6	7	1	3
Chickpea	34	8	4	5	3	2	0	68	YES	YES	34	1	1	1	1	1	1	6	1	0	1	0	2	7.5	1	3	3	1	6	5	4	5	5	1	3.4
Chickpea	35	5	4	4	3	3	1	61	YES	YES	35	1	0	1	1	1	1	5	1	1	1	1	4	9.16667	1	1	1	1	1	1	1	1	1	1	1
Chickpea	36	8	5	5	2	6	1	64	YES	YES	36	1	1	1	0	1	1	5	1	0	1	1	3	7.91667	3	2	3	2	2	1	2	3	3	2	2.3
Chickpea	37	8	4	4	3	7	0	60	YES	NO	37	1	0	0	1	0	0	2	1	0	1	1	3	5.41667	2	2	3	2	3	2	6	3	3	2	2.8
Chickpea	38	8	5	4	1	7	0	70	YES	YES	38	0	1	1	1	1	0	4	1	0	1	1	3	7.08333	2	1	1	1	1	1	1	6	2	1	1.7
Chickpea	39	7	4	4	4	4	1	76	NO	YES	39	1	1	1	1	0	0	4	0	0	1	0	1	4.58333	4	5	4	4	4	3	4	6	6	4	4.4
Chickpea	40	7	4	4	1	7	0	67	NO	NO	40	1	1	1	1	1	1	6	1	1	1	1	4	10	5	2	2	4	3	3	5	6	6	3	3.9
Chickpea	41	8	5	5	1	7	1	71	YES	YES	41	1	1	1	1	1	1	6	0	1	1	0	2	7.5	5	2	7	2	6	5	5	5	7	5	4.9
Chickpea	42	8	4	5	4	3	0	66	NO	NO	42	1	1	1	1	1	1	6	1	1	1	1	4	10	4	2	6	2	1	2	1	4	5	2	2.9
Chickpea	43	6	3	3	5	3	1	67	NO	NO	43	0	0	1	1	0	0	2	1	0	1	1	3	5.41667	5	3	3	3	3	3	2	2	5	3	3.2
Chickpea	44	9	5	5	1	7	1	67	YES	YES	44	1	1	1	1	0	1	5	0	0	1	0	1	5.41667	5	3	3	3	3	5	3	1	5	7	3.8
Chickpea	45	8	5	5	3	5	0	64	NO	NO	45	1	1	1	1	0	0	4	0	0	1	1	2	5.83333	5	1	2	1	2	1	1	3	2	1	1.9
Chickpea	46	8	5	4	2	6	0	75	YES	YES	46	1	1	1	1	1	1	6	1	0	1	1	3	8.75	2	3	3	1	1	2	1	4	5	1	2.3
Chickpea	47	8	5	5	3	5	0	61	NO	NO	47	1	1	1	1	0	0	4	1	0	1	1	3	7.08333	5	3	5	2	2	2	2	5	7	2	3.5
Chickpea	48	7	4	4	2	6	1	60	NO	NO	48	0	0	0	0	0	0	0	1	0	1	1	3	3.75	6	4	3	5	4	3	5	2	6	5	4.3
Chickpea	49	9	5	5	1	7	0	60	NO	YES	49	1	0	0	1	1	1	4	1	0	1	1	3	7.08333	6	2	2	3	6	2	2	2	2	3	3
Chickpea	50	8	5	5	5	5	0	66	NO	NO	50	1	1	1	1	0	1	5	0	0	1	1	2	6.66667	6	3	1	4	3	1	2	3	4	6	3.3
Chickpea	51	8	4	4	2	6	1	68	NO	NO	51	1	1	1	0	0	0	3	0	0	1	0	1	3.75	6	2	6	6	2	2	2	6	6	6	4.4
Chickpea	52	8	5	5	5	3	0	69	NO	YES	52	0	0	1	0	0	0	1	1	0	1	0	2	3.33333	3	7	3	2	3	3	7	3	5	2	3.8
Chickpea	53	8	4	4	3	5	0	66	YES	YES	53	0	0	0	1	1	1	3	1	0	1	1	3	6.25	1	4	6	2	5	3	3	3	5	3	3.5
Chickpea	54	7	4	4	2	6	1	65	NO	NO	54	1	1	1	1	0	0	4	1	0	1	0	2	5.83333	4	1	3	2	1	1	2	2	6	2	2.4
Chickpea	55	7	4	4	5	5	0	72	YES	YES	55	1	1	1	1	0	0	4	0	1	1	1	3	7.08333	3	5	5	2	3	2	5	5	3	2	3.5
Chickpea	56	7	4	4	5	5	0	71	YES	YES	56	1	0	1	1	1	1	5	1	1	1	0	3	7.91667	3	1	2	2	2	1	2	5	7	3	2.8
Chickpea	57	8	5	5	1	7	0	73	YES	YES	57	1	1	1	1	0	0	4	1	0	1	0	2	5.83333	4	1	4	1	1	1	4	1	4	1	2.2
Chickpea	58	8	4	4	4	7	0	66	NO	YES	58	0	0	0	1	0	0	1	0	0	1	0	1	2.08333	3	5	5	3	5	3	6	5	2	2	3.9
Chickpea	59	8	4	4	3	6	1	68	NO	NO	59	1	0	1	1	1	1	5	0	0	1	0	1	5.41667	2	2	2	2	2	2	2	2	2	2	2
Chickpea	60	7	4	4	5	6	0	78	YES	YES	60	0	1	1	0	0	0	2	1	1	1	0	3	5.41667	3	4	3	4	2	1	5	6	6	1	3.5
Chickpea	61	7	4	4	2	6	1	66	YES	YES	61	1	1	1	1	1	1	6	0	1	0	0	1	6.25	5	4	3	2	2	2	2	6	2	2	3
Chickpea	62	8	4	4	5	3	1	72	NO	NO	62	1	0	0	1	1	1	4	1	0	1	0	2	5.83333	1	2	3	1	2	1	7	4	2	1	2.4
Chickpea	63	7	4	4	1	7	0	66	NO	NO	63	1	1	0	0	0	0	2	0	0	1	1	2	4.16667	4	2	2	2	3	2	1	1	3	2	2.2
Chickpea	64	6	4	3	3	3	1	65	NO	YES	64	1	1	1	1	0	0	4	1	1	1	1	4	8.33333	3	5	1	1	2	1	7	6	6	1	3.3
Chickpea	65	7	4	4	1	6	0	64	YES	YES	65	1	1	1	1	0	0	4	1	1	1	1	4	8.33333	6	2	3	2	1	1	2	5	3	7	3.2
Chickpea	66	8	4	4	3	6	1	67	YES	YES	66	1	0	1	0	0	0	2	0	0	1	1	2	4.16667	3	5	3	1	2	2	1	3	1	1	2.2
Chickpea	67	8	5	5	5	5	0	78	YES	YES	67	1	0	1	1	1	1	5	1	1	1	0	3	7.91667	2	6	1	2	1	1	2	7	4	2	2.8
Chickpea	68	7	5	5	2	7	1	66	YES	NO	68	1	0	0	1	0	1	3	1	0	1	1	3	6.25	2	2	2	1	2	1	1	6	1	1	1.9
Chickpea	69	5	4	4	5	3	1	67	NO	YES	69	1	1	1	1	1	1	6	1	1	1	1	4	10	3	1	3	2	5	3	1	6	7	3	3.4
Chickpea	70	8	5	5	1	7	1	76	YES	NO	70	0	1	1	1	0	0	3	0	1	1	0	2	5	5	5	6	5	3	5	5	7	7	7	5.5
Chickpea	71	7	4	4	4	1	1	67	YES	YES	71	0	1	1	0	0	0	2	1	0	1	1	3	5.41667	6	4	6	4	4	2	3	6	4	6	4.5
Chickpea	72	8	5	5	2	6	1	68	YES	YES	72	1	0	1	0	0	0	2	0	0	1	1	2	4.16667	3	4	3	2	2	2	2	2	4	2	2.6
Chickpea	73	8	5	5	5	3	1	64	NO	NO	73	0	1	1	1	0	0	3	1	0	1	1	3	6.25	4	1	1	1	1	1	1	1	4	1	1.6
Chickpea	74	6	4	3	1	6	1	66	NO	NO	74	1	0	1	1	1	1	5	0	1	1	1	3	7.91667	3	3	1	1	1	2	1	3	5	1	2.1
Chickpea	75	5	3	4	1	7	1	67	NO	NO	75	1	0	0	1	1	1	4	1	1	1	1	4	8.33333	2	2	1	2	3	1	1	3	3	1	1.9
Chickpea	76	7	4	4	3	6	1	64	NO	NO	76	1	1	1	0	0	0	3	1	1	1	1	4	7.5	5	3	5	3	5	2	2	4	4	4	3.7
Chickpea	77	8	4	5	4	6	1	66	YES	NO	77	1	1	1	1	0	0	4	1	1	1	1	4	8.33333	4	4	2	1	1	4	5	6	7	1	3.5
Chickpea	78	8	4	5	2	5	1	71	YES	YES	78	1	0	0	0	0	1	2	1	0	1	1	3	5.41667	7	4	7	4	1	5	6	7	6	5	5.2
Chickpea	79	7	4	4	3	7	0	65	NO	NO	79	1	0	1	1	1	1	5	1	0	1	0	2	6.66667	5	2	6	2	2	5	5	2	6	1	3.6
Chickpea	80	8	4	5	6	2	1	66	NO	NO	80	1	1	1	1	0	0	4	0	1	1	0	2	5.83333	1	1	1	1	1	1	1	4	2	1	1.4
Chickpea	81	7	4	4	2	6	1	66	NO	NO	81	1	0	1	1	0	0	3	0	1	1	1	3	6.25	3	3	2	3	3	3	3	6	3	2	3.1
Chickpea	82	8	5	5	1	7	0	65	NO	NO	82	1	0	1	1	1	1	5	1	0	1	1	3	7.91667	3	3	2	2	3	1	5	6	6	2	3.3
Chickpea	83	7	5	5	1	7	1	60	YES	YES	83	1	1	1	1	1	0	5	1	0	1	1	3	7.91667	3	1	1	1	1	1	1	1	1	2	1.3
Chickpea	84	7	5	4	1	7	1	63	NO	NO	84	1	0	0	1	1	1	4	0	0	1	0	1	4.58333	1	2	7	2	1	2	7	3	7	1	3.3
Chickpea	85	5	4	4	5	5	1	62	NO	YES	85	0	1	1	0	0	0	2	1	1	1	0	3	5.41667	4	2	2	2	2	2	2	4	5	2	2.7
Chickpea	86	8	4	5	5	4	1	68	NO	NO	86	1	0	1	1	1	1	5	0	1	1	1	3	7.91667	6	4	5	5	5	3	3	5	5	5	4.6
Chickpea	87	7	4	4	2	3	1	64	NO	NO	87	0	1	1	1	0	0	3	0	0	1	0	1	3.75	4	2	1	1	1	7	1	6	5	2	3
Chickpea	88	8	5	5	3	2	1	71	NO	NO	88	1	0	0	1	1	1	4	1	0	1	0	2	5.83333	6	2	2	2	2	1	2	6	2	1	2.6
Chickpea	89	7	4	4	1	3	1	63	NO	NO	89	1	0	0	1	1	1	4	0	1	1	0	2	5.83333	4	4	5	4	3	3	2	3	4	5	3.7
Chickpea	90	7	3	3	7	2	1	69	YES	YES	90	1	1	1	1	0	0	4	1	1	1	1	4	8.33333	3	4	4	3	3	3	3	4	7	4	3.8
Chickpea	91	8	5	4	3	5	1	63	NO	NO	91	0	0	1	1	0	0	2	1	0	1	0	2	4.16667	2	4	2	2	3	2	2	3	2	3	2.5
Chickpea	92	8	4	4	6	2	0	78	YES	YES	92	1	0	1	1	1	1	5	1	1	1	1	4	9.16667	1	1	1	1	5	1	1	3	7	1	2.2
Chickpea	93	8	4	4	2	4	0	69	NO	NO	93	1	0	1	1	1	1	5	1	0	1	1	3	7.91667	5	2	1	2	2	2	1	1	2	2	2
Chickpea	94	8	5	5	7	1	0	70	YES	YES	94	0	1	1	1	0	0	3	0	1	1	1	3	6.25	5	4	7	2	5	3	6	3	6	3	4.4
Chickpea	95	6	4	4	3	6	1	70	NO	NO	95	1	1	1	0	0	0	3	0	0	1	0	1	3.75	5	2	3	2	5	2	2	3	3	3	3
Chickpea	96	6	3	2	5	2	0	70	NO	NO	96	1	1	1	1	0	0	4	1	1	1	1	4	8.33333	6	5	7	2	5	2	5	6	7	3	4.8
Chickpea	97	8	4	5	3	5	1	64	YES	YES	97	1	1	1	1	1	1	6	1	0	1	1	3	8.75	5	3	3	3	2	2	2	2	3	3	2.8
Chickpea	98	5	4	3	2	6	1	65	NO	NO	98	0	1	1	0	0	0	2	1	1	1	0	3	5.41667	4	5	6	3	2	2	2	4	4	2	3.4
Chickpea	99	4	4	2	4	3	1	64	NO	NO	99	1	0	1	0	1	1	4	0	0	1	0	1	4.58333	2	2	2	2	2	4	2	2	3	2	2.3
Chickpea	100	9	5	5	1	7	0	72	YES	YES	100	1	1	1	1	1	1	6	1	1	1	1	4	10	3	3	3	3	3	7	5	3	6	2	3.8
Chickpea	101	1	5	5	1	7	0	70	NO	YES	101	1	0	1	0	0	1	3	0	1	1	0	2	5	3	4	2	2	5	3	6	7	7	3	4.2
Chickpea	102	3	3	2	3	4	0	60	NO	NO	102	1	1	1	1	1	1	6	1	1	1	1	4	10	2	6	5	1	6	1	4	6	5	1	3.7
Lenteja	1	8	5	5	1	7	0	62	NO	NO	1	1	1	1	1	1	1	6	1	0	1	0	2	7.5	2	1	5	3	2	2	3	4	3	2	2.7
Lenteja	2	6	4	3	3	6	0	63	NO	NO	2	0	1	1	0	0	0	2	0	0	1	0	1	2.91667	2	2	3	2	4	5	3	2	6	2	3.1
Lenteja	3	8	5	5	2	6	1	70	YES	YES	3	0	1	0	1	1	1	4	1	0	1	1	3	7.08333	5	2	6	3	4	4	2	1	6	5	3.8
Lenteja	4	6	2	3	4	5	0	68	NO	NO	4	0	1	0	0	0	0	1	1	0	0	0	1	2.08333	3	1	7	2	5	2	4	7	7	1	3.9
Lenteja	5	7	5	4	2	6	0	68	YES	YES	5	1	0	1	1	1	1	5	0	0	1	0	1	5.41667	2	2	2	2	1	2	2	2	3	2	2
Lenteja	6	2	4	5	1	1	1	63	NO	NO	6	1	1	1	0	0	1	4	0	0	1	1	2	5.83333	2	2	2	2	4	2	1	2	6	2	2.5
Lenteja	7	6	3	4	7	1	1	73	NO	NO	7	1	1	1	0	0	0	3	0	1	1	1	3	6.25	1	1	1	1	1	1	1	1	1	1	1
Lenteja	8	8	4	4	6	7	1	73	YES	YES	8	1	0	1	1	1	1	5	1	1	1	0	3	7.91667	2	6	6	2	6	3	3	4	5	3	4
Lenteja	9	8	5	4	3	6	0	69	NO	NO	9	1	1	0	1	1	1	5	1	0	1	1	3	7.91667	1	1	1	1	3	1	1	5	7	2	2.3
Lenteja	10	3	3	1	3	3	0	66	NO	YES	10	0	0	1	0	0	0	1	0	1	1	0	2	3.33333	2	3	6	2	1	2	2	3	2	2	2.5
Lenteja	11	8	5	5	1	7	0	68	NO	YES	11	1	0	0	1	1	1	4	0	1	1	0	2	5.83333	1	1	5	3	1	2	1	3	7	2	2.6
Lenteja	12	8	4	4	4	4	0	68	YES	YES	12	1	1	1	1	1	1	6	1	0	1	1	3	8.75	4	4	6	2	2	3	2	4	7	2	3.6
Lenteja	13	8	5	5	3	7	0	73	YES	YES	13	0	1	0	1	0	0	2	1	1	1	1	4	6.66667	5	5	3	2	5	3	4	6	4	3	4
Lenteja	14	8	5	4	3	5	0	74	YES	YES	14	1	0	1	1	1	1	5	0	0	1	0	1	5.41667	5	4	5	3	4	3	4	3	5	5	4.1
Lenteja	15	6	4	2	5	5	0	69	NO	NO	15	0	1	1	1	1	1	5	1	1	1	1	4	9.16667	5	4	3	3	3	3	3	4	5	4	3.7
Lenteja	16	9	5	5	2	7	0	61	YES	YES	16	1	1	1	1	1	1	6	1	0	1	1	3	8.75	2	1	3	1	1	1	1	1	3	1	1.5
Lenteja	17	4	3	2	6	2	1	67	NO	NO	17	1	0	0	1	1	1	4	1	0	1	1	3	7.08333	3	2	2	3	3	2	2	1	2	3	2.3
Lenteja	18	7	4	4	4	4	0	63	YES	YES	18	0	1	1	1	0	0	3	0	0	1	0	1	3.75	2	3	4	2	4	2	3	5	2	1	2.8
Lenteja	19	6	3	3	3	7	1	80	NO	YES	19	0	0	1	0	0	0	1	0	1	1	1	3	4.58333	4	4	6	2	6	2	2	6	5	4	4.1
Lenteja	20	7	4	4	4	6	0	79	NO	YES	20	0	0	1	1	0	0	2	1	1	1	0	3	5.41667	7	4	5	3	4	2	4	1	3	2	3.5
Lenteja	21	6	4	4	5	6	0	70	NO	NO	21	1	1	1	1	1	1	6	0	0	1	0	1	6.25	1	1	3	2	1	2	1	5	4	2	2.2
Lenteja	22	8	5	5	4	6	0	64	YES	YES	22	1	1	1	1	1	1	6	1	0	1	0	2	7.5	2	2	2	1	1	2	1	1	1	1	1.4
Lenteja	23	7	5	4	4	5	0	63	YES	YES	23	1	0	1	1	1	1	5	0	0	1	1	2	6.66667	6	3	3	1	3	2	2	6	7	2	3.5
Lenteja	24	7	4	4	2	7	0	66	YES	YES	24	1	0	1	0	1	0	3	0	1	0	1	2	5	4	2	2	2	2	2	2	2	6	2	2.6
Lenteja	25	8	5	5	1	7	0	65	NO	NO	25	1	0	0	1	1	1	4	1	1	1	0	3	7.08333	3	1	1	1	1	1	1	2	3	2	1.6
Lenteja	26	7	4	4	1	6	0	62	YES	YES	26	1	0	0	1	1	1	4	1	1	1	1	4	8.33333	3	1	2	3	2	2	1	4	6	2	2.6
Lenteja	27	7	4	4	2	6	1	73	YES	YES	27	1	0	0	1	0	0	2	0	0	1	0	1	2.91667	2	2	2	2	2	2	2	2	5	2	2.3
Lenteja	28	8	5	5	1	7	0	71	YES	YES	28	0	1	0	1	1	1	4	0	1	1	1	3	7.08333	1	1	4	1	7	1	3	7	7	1	3.3
Lenteja	29	8	4	4	6	2	1	63	NO	NO	29	0	1	1	1	0	0	3	0	0	1	0	1	3.75	4	2	2	2	2	2	2	2	5	2	2.5
Lenteja	30	6	4	3	1	7	1	66	YES	YES	30	1	1	1	1	1	0	5	1	1	1	1	4	9.16667	4	1	1	1	1	1	1	2	2	1	1.5
Lenteja	31	5	3	3	4	5	1	67	NO	YES	31	1	0	1	1	0	0	3	0	0	1	1	2	5	3	4	4	3	4	3	5	4	3	5	3.8
Lenteja	32	3	3	1	4	3	0	63	NO	YES	32	1	0	1	0	0	0	2	1	0	0	1	2	4.16667	7	7	7	4	4	7	7	5	7	2	5.7
Lenteja	33	8	5	5	5	3	1	68	YES	YES	33	1	1	0	1	0	0	3	1	0	1	1	3	6.25	2	2	7	1	2	1	1	6	7	1	3
Lenteja	34	8	4	4	4	2	0	68	YES	YES	34	1	1	1	1	1	1	6	1	0	1	0	2	7.5	1	3	3	1	6	5	4	5	5	1	3.4
Lenteja	35	3	3	1	2	4	1	61	YES	YES	35	1	0	1	1	1	1	5	1	1	1	1	4	9.16667	1	1	1	1	1	1	1	1	1	1	1
Lenteja	36	8	5	5	2	6	1	64	YES	YES	36	1	1	1	0	1	1	5	1	0	1	1	3	7.91667	3	2	3	2	2	1	2	3	3	2	2.3
Lenteja	37	8	4	5	1	7	0	60	YES	NO	37	1	0	0	1	0	0	2	1	0	1	1	3	5.41667	2	2	3	2	3	2	6	3	3	2	2.8
Lenteja	38	9	5	5	1	6	0	70	YES	YES	38	0	1	1	1	1	0	4	1	0	1	1	3	7.08333	2	1	1	1	1	1	1	6	2	1	1.7
Lenteja	39	8	4	5	5	3	1	76	NO	YES	39	1	1	1	1	0	0	4	0	0	1	0	1	4.58333	4	5	4	4	4	3	4	6	6	4	4.4
Lenteja	40	4	4	2	1	7	0	67	NO	NO	40	1	1	1	1	1	1	6	1	1	1	1	4	10	5	2	2	4	3	3	5	6	6	3	3.9
Lenteja	41	4	5	2	1	7	1	71	YES	YES	41	1	1	1	1	1	1	6	0	1	1	0	2	7.5	5	2	7	2	6	5	5	5	7	5	4.9
Lenteja	42	8	4	5	4	3	0	66	NO	NO	42	1	1	1	1	1	1	6	1	1	1	1	4	10	4	2	6	2	1	2	1	4	5	2	2.9
Lenteja	43	6	4	3	5	3	1	67	NO	NO	43	0	0	1	1	0	0	2	1	0	1	1	3	5.41667	5	3	3	3	3	3	2	2	5	3	3.2
Lenteja	44	9	5	5	1	7	1	67	YES	YES	44	1	1	1	1	0	1	5	0	0	1	0	1	5.41667	5	3	3	3	3	5	3	1	5	7	3.8
Lenteja	45	8	5	5	3	5	0	64	NO	NO	45	1	1	1	1	0	0	4	0	0	1	1	2	5.83333	5	1	2	1	2	1	1	3	2	1	1.9
Lenteja	46	6	4	4	4	6	0	75	YES	YES	46	1	1	1	1	1	1	6	1	0	1	1	3	8.75	2	3	3	1	1	2	1	4	5	1	2.3
Lenteja	47	7	4	4	3	3	0	61	NO	NO	47	1	1	1	1	0	0	4	1	0	1	1	3	7.08333	5	3	5	2	2	2	2	5	7	2	3.5
Lenteja	48	7	4	4	2	6	1	60	NO	NO	48	0	0	0	0	0	0	0	1	0	1	1	3	3.75	6	4	3	5	4	3	5	2	6	5	4.3
Lenteja	49	9	5	5	1	7	0	60	NO	YES	49	1	0	0	1	1	1	4	1	0	1	1	3	7.08333	6	2	2	3	6	2	2	2	2	3	3
Lenteja	50	8	4	5	5	3	0	66	NO	NO	50	1	1	1	1	0	1	5	0	0	1	1	2	6.66667	6	3	1	4	3	1	2	3	4	6	3.3
Lenteja	51	4	4	3	2	6	1	68	NO	NO	51	1	1	1	0	0	0	3	0	0	1	0	1	3.75	6	2	6	6	2	2	2	6	6	6	4.4
Lenteja	52	6	5	4	5	3	0	69	NO	YES	52	0	0	1	0	0	0	1	1	0	1	0	2	3.33333	3	7	3	2	3	3	7	3	5	2	3.8
Lenteja	53	5	3	3	4	5	0	66	YES	YES	53	0	0	0	1	1	1	3	1	0	1	1	3	6.25	1	4	6	2	5	3	3	3	5	3	3.5
Lenteja	54	6	4	4	2	6	1	65	NO	NO	54	1	1	1	1	0	0	4	1	0	1	0	2	5.83333	4	1	3	2	1	1	2	2	6	2	2.4
Lenteja	55	8	5	5	6	6	0	72	YES	YES	55	1	1	1	1	0	0	4	0	1	1	1	3	7.08333	3	5	5	2	3	2	5	5	3	2	3.5
Lenteja	56	7	4	4	5	3	0	71	YES	YES	56	1	0	1	1	1	1	5	1	1	1	0	3	7.91667	3	1	2	2	2	1	2	5	7	3	2.8
Lenteja	57	8	5	5	1	7	0	73	YES	YES	57	1	1	1	1	0	0	4	1	0	1	0	2	5.83333	4	1	4	1	1	1	4	1	4	1	2.2
Lenteja	58	6	3	3	4	5	0	66	NO	YES	58	0	0	0	1	0	0	1	0	0	1	0	1	2.08333	3	5	5	3	5	3	6	5	2	2	3.9
Lenteja	59	8	4	4	5	5	1	68	NO	NO	59	1	0	1	1	1	1	5	0	0	1	0	1	5.41667	2	2	2	2	2	2	2	2	2	2	2
Lenteja	60	8	5	4	5	5	0	78	YES	YES	60	0	1	1	0	0	0	2	1	1	1	0	3	5.41667	3	4	3	4	2	1	5	6	6	1	3.5
Lenteja	61	4	4	2	1	6	1	66	YES	YES	61	1	1	1	1	1	1	6	0	1	0	0	1	6.25	5	4	3	2	2	2	2	6	2	2	3
Lenteja	62	8	4	5	5	6	1	72	NO	NO	62	1	0	0	1	1	1	4	1	0	1	0	2	5.83333	1	2	3	1	2	1	7	4	2	1	2.4
Lenteja	63	1	5	5	1	7	0	66	NO	NO	63	1	1	0	0	0	0	2	0	0	1	1	2	4.16667	4	2	2	2	3	2	1	1	3	2	2.2
Lenteja	64	3	3	2	3	5	1	65	NO	YES	64	1	1	1	1	0	0	4	1	1	1	1	4	8.33333	3	5	1	1	2	1	7	6	6	1	3.3
Lenteja	65	4	3	2	1	3	0	64	YES	YES	65	1	1	1	1	0	0	4	1	1	1	1	4	8.33333	6	2	3	2	1	1	2	5	3	7	3.2
Lenteja	66	5	3	2	3	6	1	67	YES	YES	66	1	0	1	0	0	0	2	0	0	1	1	2	4.16667	3	5	3	1	2	2	1	3	1	1	2.2
Lenteja	67	7	5	4	2	7	0	78	YES	YES	67	1	0	1	1	1	1	5	1	1	1	0	3	7.91667	2	6	1	2	1	1	2	7	4	2	2.8
Lenteja	68	6	4	4	3	6	1	66	YES	NO	68	1	0	0	1	0	1	3	1	0	1	1	3	6.25	2	2	2	1	2	1	1	6	1	1	1.9
Lenteja	69	6	4	4	5	3	1	67	NO	YES	69	1	1	1	1	1	1	6	1	1	1	1	4	10	3	1	3	2	5	3	1	6	7	3	3.4
Lenteja	70	4	4	2	3	2	1	76	YES	NO	70	0	1	1	1	0	0	3	0	1	1	0	2	5	5	5	6	5	3	5	5	7	7	7	5.5
Lenteja	71	7	4	4	4	2	1	67	YES	YES	71	0	1	1	0	0	0	2	1	0	1	1	3	5.41667	6	4	6	4	4	2	3	6	4	6	4.5
Lenteja	72	8	4	5	1	6	1	68	YES	YES	72	1	0	1	0	0	0	2	0	0	1	1	2	4.16667	3	4	3	2	2	2	2	2	4	2	2.6
Lenteja	73	6	4	4	5	3	1	64	NO	NO	73	0	1	1	1	0	0	3	1	0	1	1	3	6.25	4	1	1	1	1	1	1	1	4	1	1.6
Lenteja	74	7	4	4	1	6	1	66	NO	NO	74	1	0	1	1	1	1	5	0	1	1	1	3	7.91667	3	3	1	1	1	2	1	3	5	1	2.1
Lenteja	75	7	4	4	4	5	1	67	NO	NO	75	1	0	0	1	1	1	4	1	1	1	1	4	8.33333	2	2	1	2	3	1	1	3	3	1	1.9
Lenteja	76	7	4	3	4	4	1	64	NO	NO	76	1	1	1	0	0	0	3	1	1	1	1	4	7.5	5	3	5	3	5	2	2	4	4	4	3.7
Lenteja	77	9	5	5	4	5	1	66	YES	NO	77	1	1	1	1	0	0	4	1	1	1	1	4	8.33333	4	4	2	1	1	4	5	6	7	1	3.5
Lenteja	78	7	4	4	1	4	1	71	YES	YES	78	1	0	0	0	0	1	2	1	0	1	1	3	5.41667	7	4	7	4	1	5	6	7	6	5	5.2
Lenteja	79	7	4	3	3	7	0	65	NO	NO	79	1	0	1	1	1	1	5	1	0	1	0	2	6.66667	5	2	6	2	2	5	5	2	6	1	3.6
Lenteja	80	8	4	4	6	3	1	66	NO	NO	80	1	1	1	1	0	0	4	0	1	1	0	2	5.83333	1	1	1	1	1	1	1	4	2	1	1.4
Lenteja	81	5	4	2	2	6	1	66	NO	NO	81	1	0	1	1	0	0	3	0	1	1	1	3	6.25	3	3	2	3	3	3	3	6	3	2	3.1
Lenteja	82	8	5	5	1	7	0	65	NO	NO	82	1	0	1	1	1	1	5	1	0	1	1	3	7.91667	3	3	2	2	3	1	5	6	6	2	3.3
Lenteja	83	6	5	4	1	7	1	60	YES	YES	83	1	1	1	1	1	0	5	1	0	1	1	3	7.91667	3	1	1	1	1	1	1	1	1	2	1.3
Lenteja	84	7	4	5	1	7	1	63	NO	NO	84	1	0	0	1	1	1	4	0	0	1	0	1	4.58333	1	2	7	2	1	2	7	3	7	1	3.3
Lenteja	85	6	4	4	5	5	1	62	NO	YES	85	0	1	1	0	0	0	2	1	1	1	0	3	5.41667	4	2	2	2	2	2	2	4	5	2	2.7
Lenteja	86	8	4	4	5	3	1	68	NO	NO	86	1	0	1	1	1	1	5	0	1	1	1	3	7.91667	6	4	5	5	5	3	3	5	5	5	4.6
Lenteja	87	4	4	3	7	4	1	64	NO	NO	87	0	1	1	1	0	0	3	0	0	1	0	1	3.75	4	2	1	1	1	7	1	6	5	2	3
Lenteja	88	6	5	4	6	2	1	71	NO	NO	88	1	0	0	1	1	1	4	1	0	1	0	2	5.83333	6	2	2	2	2	1	2	6	2	1	2.6
Lenteja	89	7	4	4	1	6	1	63	NO	NO	89	1	0	0	1	1	1	4	0	1	1	0	2	5.83333	4	4	5	4	3	3	2	3	4	5	3.7
Lenteja	90	8	4	5	6	2	1	69	YES	YES	90	1	1	1	1	0	0	4	1	1	1	1	4	8.33333	3	4	4	3	3	3	3	4	7	4	3.8
Lenteja	91	8	5	4	3	6	1	63	NO	NO	91	0	0	1	1	0	0	2	1	0	1	0	2	4.16667	2	4	2	2	3	2	2	3	2	3	2.5
Lenteja	92	5	4	2	7	1	0	78	YES	YES	92	1	0	1	1	1	1	5	1	1	1	1	4	9.16667	1	1	1	1	5	1	1	3	7	1	2.2
Lenteja	93	8	4	4	3	3	0	69	NO	NO	93	1	0	1	1	1	1	5	1	0	1	1	3	7.91667	5	2	1	2	2	2	1	1	2	2	2
Lenteja	94	8	5	5	6	1	0	70	YES	YES	94	0	1	1	1	0	0	3	0	1	1	1	3	6.25	5	4	7	2	5	3	6	3	6	3	4.4
Lenteja	95	4	4	3	2	6	1	70	NO	NO	95	1	1	1	0	0	0	3	0	0	1	0	1	3.75	5	2	3	2	5	2	2	3	3	3	3
Lenteja	96	6	3	3	5	2	0	70	NO	NO	96	1	1	1	1	0	0	4	1	1	1	1	4	8.33333	6	5	7	2	5	2	5	6	7	3	4.8
Lenteja	97	7	4	5	3	5	1	64	YES	YES	97	1	1	1	1	1	1	6	1	0	1	1	3	8.75	5	3	3	3	2	2	2	2	3	3	2.8
Lenteja	98	7	4	4	1	7	1	65	NO	NO	98	0	1	1	0	0	0	2	1	1	1	0	3	5.41667	4	5	6	3	2	2	2	4	4	2	3.4
Lenteja	99	5	4	3	3	3	1	64	NO	NO	99	1	0	1	0	1	1	4	0	0	1	0	1	4.58333	2	2	2	2	2	4	2	2	3	2	2.3
Lenteja	100	6	4	2	2	7	0	72	YES	YES	100	1	1	1	1	1	1	6	1	1	1	1	4	10	3	3	3	3	3	7	5	3	6	2	3.8
Lenteja	101	8	4	5	1	7	0	70	NO	YES	101	1	0	1	0	0	1	3	0	1	1	0	2	5	3	4	2	2	5	3	6	7	7	3	4.2
Lenteja	102	3	3	2	4	4	0	60	NO	NO	102	1	1	1	1	1	1	6	1	1	1	1	4	10	2	6	5	1	6	1	4	6	5	1	3.7

## Sheet: XLSTAT_20231206_175301_1_HID1
Resumen (Medias) - Concentracio (Color):
Categoría	Y50 (Pa.s)	G' (Pa)	G'' (Pa)
10	10.7359	4613.47	897.832
7,5	5.77993	3262.16	595.88
5	2.42999	1320.19	246.465

## Sheet: XLSTAT_20231206_175301_1_HID
1		2.09775	0.00261121	1		1.94399	4.05302	Categoría	Media	Error estándar	Límite inferior (95%)	Límite superior (95%)
2		2.25406	0.172621	2		2.10253	4.19725	5	2.42999	0.390472	1.18733	3.67265
3		2.41037	0.342199	3		2.26107	4.34191	7,5	5.77993	0.390472	4.53727	7.02258
4		2.56668	0.511336	4		2.41961	4.48701	10	10.7359	0.390472	9.49329	11.9786
5		2.72299	0.680026	5		2.57815	4.63257
6		2.8793	0.848259	6		2.73668	4.77859
7		3.03561	1.01603	7		2.89522	4.92508	1		1188.46	-390.288	1		1056.15	2659.59	Categoría	Media	Error estándar	Límite inferior (95%)	Límite superior (95%)
8		3.19192	1.18332	8		3.05376	5.07204	2		1251.47	-315.984	2		1121.08	2712.24	5	1320.19	287.564	405.031	2235.35
9		3.34823	1.35014	9		3.2123	5.2195	3		1314.48	-241.987	3		1186.01	2765.2	7,5	3262.16	287.564	2347	4177.32
10		3.50454	1.51647	10		3.37084	5.36745	4		1377.49	-168.305	4		1250.94	2818.48	10	4613.47	287.564	3698.31	5528.63
11		3.66085	1.6823	11		3.52938	5.5159	5		1440.5	-94.9439	5		1315.86	2872.09
12		3.81716	1.84763	12		3.68791	5.66487	6		1503.51	-21.9102	6		1380.79	2926.03
13		3.97347	2.01245	13		3.84645	5.81435	7		1566.52	50.7896	7		1445.72	2980.32	1		220.41	-2.29819	1		197.172	422.933	Categoría	Media	Error estándar	Límite inferior (95%)	Límite superior (95%)
14		4.12978	2.17675	14		4.00499	5.96436	8		1629.53	123.149	8		1510.65	3034.95	2		232.83	11.6911	2		209.929	433.996	5	246.465	40.7995	116.623	376.307
15		4.28609	2.34053	15		4.16353	6.1149	9		1692.54	195.161	9		1575.57	3089.94	3		245.251	25.636	3		222.686	445.104	7,5	595.88	40.7995	466.038	725.723
16		4.4424	2.50379	16		4.32207	6.26598	10		1755.55	266.821	10		1640.5	3145.29	4		257.671	39.5353	4		235.443	456.258	10	897.832	40.7995	767.99	1027.67
17		4.59871	2.66651	17		4.48061	6.4176	11		1818.56	338.121	11		1705.43	3201.01	5		270.091	53.3883	5		248.2	467.459
18		4.75502	2.82869	18		4.63914	6.56978	12		1881.57	409.055	12		1770.36	3257.11	6		282.511	67.194	6		260.957	478.708
19		4.91133	2.99032	19		4.79768	6.72251	13		1944.58	479.619	13		1835.28	3313.59	7		294.931	80.9515	7		273.713	490.007	1		0.182151	0.145298	1		0.146128	0.251729	Categoría	Media	Error estándar	Límite inferior (95%)	Límite superior (95%)
20		5.06764	3.15141	20		4.95622	6.8758	14		2007.59	549.805	14		1900.21	3370.45	8		307.351	94.6598	8		286.47	501.356	2		0.182909	0.146698	2		0.147407	0.250119	5	0.185814	0.00702533	0.163457	0.208172
21		5.22395	3.31194	21		5.11476	7.02966	15		2070.6	619.608	15		1965.14	3427.72	9		319.771	108.318	9		299.227	512.756	3		0.183667	0.148016	3		0.148687	0.24852	7,5	0.182659	0.00702533	0.160302	0.205017
22		5.38026	3.47192	22		5.2733	7.18409	16		2133.61	689.024	16		2030.07	3485.39	10		332.191	121.925	10		311.984	524.208	4		0.184425	0.149251	4		0.149967	0.246932	10	0.195366	0.00702533	0.173008	0.217724
23		5.53657	3.63133	23		5.43184	7.3391	17		2196.62	758.046	17		2095	3543.46	11		344.612	135.481	11		324.741	535.713	5		0.185182	0.150397	5		0.151247	0.245356
24		5.69288	3.79018	24		5.59037	7.49468	18		2259.63	826.67	18		2159.92	3601.95	12		357.032	148.984	12		337.498	547.273	6		0.18594	0.151453	6		0.152527	0.243793
25		5.84919	3.94847	25		5.74891	7.65084	19		2322.64	894.892	19		2224.85	3660.86	13		369.452	162.434	13		350.255	558.887	7		0.186698	0.152416	7		0.153807	0.242244
26		6.0055	4.10619	26		5.90745	7.80758	20		2385.65	962.705	20		2289.78	3720.2	14		381.872	175.829	14		363.012	570.557	8		0.187456	0.153284	8		0.155087	0.240711
27		6.16181	4.26335	27		6.06599	7.9649	21		2448.66	1030.11	21		2354.71	3779.96	15		394.292	189.169	15		375.769	582.284	9		0.188214	0.154056	9		0.156367	0.239195
28		6.31812	4.41993	28		6.22453	8.12281	22		2511.67	1097.09	22		2419.63	3840.16	16		406.712	202.453	16		388.526	594.069	10		0.188971	0.154732	10		0.157646	0.237699
29		6.47443	4.57595	29		6.38307	8.28131	23		2574.68	1163.66	23		2484.56	3900.8	17		419.132	215.681	17		401.283	605.912	11		0.189729	0.155313	11		0.158926	0.236224
30		6.63074	4.73139	30		6.5416	8.44039	24		2637.69	1229.81	24		2549.49	3961.88	18		431.552	228.852	18		414.04	617.815	12		0.190487	0.1558	12		0.160206	0.234772
31		6.78705	4.88627	31		6.70014	8.60006	25		2700.7	1295.53	25		2614.42	4023.41	19		443.973	241.965	19		426.796	629.777	13		0.191245	0.156195	13		0.161486	0.233347
32		6.94336	5.04058	32		6.85868	8.76031	26		2763.71	1360.83	26		2679.34	4085.39	20		456.393	255.02	20		439.553	641.801	14		0.192003	0.156502	14		0.162766	0.231952
33		7.09967	5.19433	33		7.01722	8.92114	27		2826.72	1425.69	27		2744.27	4147.82	21		468.813	268.015	21		452.31	653.885	15		0.19276	0.156723	15		0.164046	0.230589
34		7.25598	5.34751	34		7.17576	9.08255	28		2889.73	1490.12	28		2809.2	4210.71	22		481.233	280.952	22		465.067	666.032	16		0.193518	0.156863	16		0.165326	0.229263
35		7.41229	5.50014	35		7.3343	9.24454	29		2952.74	1554.13	29		2874.13	4274.05	23		493.653	293.828	23		477.824	678.241	17		0.194276	0.156925	17		0.166606	0.22798
36		7.5686	5.6522	36		7.49284	9.40711	30		3015.76	1617.69	30		2939.06	4337.85	24		506.073	306.644	24		490.581	690.513	18		0.195034	0.156914	18		0.167886	0.226743
37		7.72491	5.80372	37		7.65137	9.57024	31		3078.77	1680.83	31		3003.98	4402.12	25		518.493	319.399	25		503.338	702.849	19		0.195792	0.156833	19		0.169165	0.22556
38		7.88122	5.95468	38		7.80991	9.73394	32		3141.78	1743.53	32		3068.91	4466.84	26		530.913	332.093	26		516.095	715.249	20		0.196549	0.156688	20		0.170445	0.224438
39		8.03753	6.1051	39		7.96845	9.89821	33		3204.79	1805.79	33		3133.84	4532.02	27		543.334	344.726	27		528.852	727.713	21		0.197307	0.156483	21		0.171725	0.223385
40		8.19384	6.25499	40		8.12699	10.063	34		3267.8	1867.63	34		3198.77	4597.67	28		555.754	357.298	28		541.609	740.242	22		0.198065	0.156221	22		0.173005	0.222412
41		8.35015	6.40433	41		8.28553	10.2284	35		3330.81	1929.03	35		3263.69	4663.77	29		568.174	369.808	29		554.366	752.835	23		0.198823	0.155907	23		0.174285	0.221529
42		8.50646	6.55315	42		8.44407	10.3943	36		3393.82	1990	36		3328.62	4730.33	30		580.594	382.256	30		567.122	765.494	24		0.199581	0.155545	24		0.175565	0.22075
43		8.66277	6.70145	43		8.6026	10.5608	37		3456.83	2050.54	37		3393.55	4797.35	31		593.014	394.643	31		579.879	778.217	25		0.200338	0.155138	25		0.176845	0.220089
44		8.81908	6.84923	44		8.76114	10.7278	38		3519.84	2110.66	38		3458.48	4864.83	32		605.434	406.968	32		592.636	791.006	26		0.201096	0.154689	26		0.178125	0.219564
45		8.97539	6.9965	45		8.91968	10.8953	39		3582.85	2170.35	39		3523.4	4932.76	33		617.854	419.231	33		605.393	803.859	27		0.201854	0.154202	27		0.179404	0.219191
46		9.1317	7.14327	46		9.07822	11.0633	40		3645.86	2229.63	40		3588.33	5001.13	34		630.274	431.433	34		618.15	816.778	28		0.202612	0.15368	28		0.180684	0.218992
47		9.28801	7.28955	47		9.23676	11.2319	41		3708.87	2288.48	41		3653.26	5069.96	35		642.695	443.574	35		630.907	829.761	29		0.20337	0.153125	29		0.181964	0.218987
48		9.44432	7.43533	48		9.3953	11.4009	42		3771.88	2346.92	42		3718.19	5139.22	36		655.115	455.654	36		643.664	842.809	30		0.204127	0.15254	30		0.183244	0.219197
49		9.60063	7.58064	49		9.55383	11.5705	43		3834.89	2404.95	43		3783.12	5208.93	37		667.535	467.673	37		656.421	855.921	31		0.204885	0.151927	31		0.184524	0.219642
50		9.75694	7.72547	50		9.71237	11.7405	44		3897.9	2462.58	44		3848.04	5279.07	38		679.955	479.632	38		669.178	869.097	32		0.205643	0.151289	32		0.185804	0.220338
51		9.91325	7.86984	51		9.87091	11.911	45		3960.91	2519.81	45		3912.97	5349.64	39		692.375	491.53	39		681.935	882.337	33		0.206401	0.150626	33		0.187084	0.221298
52		10.0696	8.01376	52		10.0294	12.082	46		4023.92	2576.64	46		3977.9	5420.63	40		704.795	503.37	40		694.692	895.64	34		0.207159	0.149942	34		0.188364	0.22253
53		10.2259	8.15722	53		10.188	12.2535	47		4086.93	2633.07	47		4042.83	5492.04	41		717.215	515.151	41		707.449	909.005	35		0.207916	0.149237	35		0.189643	0.224035
54		10.3822	8.30025	54		10.3465	12.4254	48		4149.94	2689.13	48		4107.75	5563.87	42		729.635	526.873	42		720.205	922.433	36		0.208674	0.148513	36		0.190923	0.225808
55		10.5385	8.44285	55		10.5051	12.5977	49		4212.95	2744.8	49		4172.68	5636.1	43		742.056	538.537	43		732.962	935.922	37		0.209432	0.147771	37		0.192203	0.227838
56		10.6948	8.58502	56		10.6636	12.7705	50		4275.96	2800.1	50		4237.61	5708.74	44		754.476	550.145	44		745.719	949.471	38		0.21019	0.147014	38		0.193483	0.230108
57		10.8511	8.72678	57		10.8221	12.9437	51		4338.97	2855.02	51		4302.54	5781.77	45		766.896	561.696	45		758.476	963.081	39		0.210948	0.146241	39		0.194763	0.2326
58		11.0074	8.86813	58		10.9807	13.1174	52		4401.98	2909.59	52		4367.47	5855.19	46		779.316	573.191	46		771.233	976.75	40		0.211705	0.145453	40		0.196043	0.235294
59		11.1637	9.00908	59		11.1392	13.2914	53		4464.99	2963.8	53		4432.39	5928.99	47		791.736	584.631	47		783.99	990.477	41		0.212463	0.144653	41		0.197323	0.238168
60		11.32	9.14965	60		11.2978	13.4659	54		4528	3017.66	54		4497.32	6003.16	48		804.156	596.017	48		796.747	1004.26	42		0.213221	0.143841	42		0.198603	0.241202
61		11.4764	9.28983	61		11.4563	13.6407	55		4591.01	3071.17	55		4562.25	6077.71	49		816.576	607.35	49		809.504	1018.1	43		0.213979	0.143017	43		0.199882	0.244377
62		11.6327	9.42964	62		11.6148	13.816	56		4654.02	3124.35	56		4627.18	6152.62	50		828.996	618.63	50		822.261	1032	44		0.214736	0.142182	44		0.201162	0.247677
63		11.789	9.56909	63		11.7734	13.9916	57		4717.03	3177.19	57		4692.1	6227.88	51		841.417	629.859	51		835.018	1045.96	45		0.215494	0.141337	45		0.202442	0.251085
64		11.9453	9.70818	64		11.9319	14.1675	58		4780.04	3229.72	58		4757.03	6303.49	52		853.837	641.036	52		847.775	1059.96	46		0.216252	0.140483	46		0.203722	0.254588
65		12.1016	9.84692	65		12.0904	14.3438	59		4843.05	3281.92	59		4821.96	6379.44	53		866.257	652.164	53		860.531	1074.02	47		0.21701	0.13962	47		0.205002	0.258174
66		12.2579	9.98533	66		12.249	14.5205	60		4906.06	3333.81	60		4886.89	6455.72	54		878.677	663.243	54		873.288	1088.13	48		0.217768	0.138749	48		0.206282	0.261832
67		12.4142	10.1234	67		12.4075	14.6975	61		4969.07	3385.4	61		4951.81	6532.33	55		891.097	674.273	55		886.045	1102.3	49		0.218525	0.13787	49		0.207562	0.265555
68		12.5705	10.2612	68		12.5661	14.8749	62		5032.08	3436.68	62		5016.74	6609.26	56		903.517	685.256	56		898.802	1116.51	50		0.219283	0.136984	50		0.208842	0.269333
69		12.7268	10.3986	69		12.7246	15.0526	63		5095.09	3487.68	63		5081.67	6686.5	57		915.937	696.193	57		911.559	1130.78	51		0.220041	0.136091	51		0.210122	0.273161
70		12.8831	10.5357	70		12.8831	15.2306	64		5158.1	3538.39	64		5146.6	6764.04	58		928.357	707.085	58		924.316	1145.09	52		0.220799	0.135192	52		0.211401	0.277032
								65		5221.11	3588.82	65		5211.53	6841.89	59		940.778	717.932	59		937.073	1159.44	53		0.221557	0.134286	53		0.212681	0.280942
								66		5284.12	3638.98	66		5276.45	6920.02	60		953.198	728.736	60		949.83	1173.85	54		0.222314	0.133375	54		0.213961	0.284886
								67		5347.13	3688.87	67		5341.38	6998.43	61		965.618	739.497	61		962.587	1188.3	55		0.223072	0.132458	55		0.215241	0.288861
								68		5410.14	3738.5	68		5406.31	7077.13	62		978.038	750.216	62		975.344	1202.79	56		0.22383	0.131536	56		0.216521	0.292864
								69		5473.15	3787.88	69		5471.24	7156.09	63		990.458	760.895	63		988.101	1217.33	57		0.224588	0.130609	57		0.217801	0.296891
								70		5536.16	3837.01	70		5536.16	7235.32	64		1002.88	771.534	64		1000.86	1231.91	58		0.225346	0.129678	58		0.219081	0.30094
																65		1015.3	782.134	65		1013.61	1246.53	59		0.226103	0.128742	59		0.220361	0.305008
																66		1027.72	792.696	66		1026.37	1261.19	60		0.226861	0.127802	60		0.22164	0.309095
																67		1040.14	803.221	67		1039.13	1275.89	61		0.227619	0.126858	61		0.22292	0.313199
																68		1052.56	813.71	68		1051.89	1290.63	62		0.228377	0.125911	62		0.2242	0.317317
																69		1064.98	824.163	69		1064.64	1305.4	63		0.229135	0.124959	63		0.22548	0.321448
																70		1077.4	834.582	70		1077.4	1320.22	64		0.229892	0.124005	64		0.22676	0.325592
																								65		0.23065	0.123047	65		0.22804	0.329747
																								66		0.231408	0.122086	66		0.22932	0.333913
																								67		0.232166	0.121122	67		0.2306	0.338088
																								68		0.232924	0.120156	68		0.231879	0.342272
																								69		0.233681	0.119187	69		0.233159	0.346464
																								70		0.234439	0.118215	70		0.234439	0.350664

## Sheet: XLSTAT_20231206_175214_1_HID1
Resumen (Medias) - Concentracio (Color):
Categoría	Y50 (Pa.s)	G' (Pa)	G'' (Pa)
10	10.1255	4375.64	847.863
7,5	5.78029	2465.71	435.304
5	2.05186	1301.67	237.102

## Sheet: XLSTAT_20231206_175214_1_HID
1		1.72891	1.37011	1		1.64149	2.00172	Categoría	Media	Error estándar	Límite inferior (95%)	Límite superior (95%)
2		1.87995	1.52356	2		1.79379	2.15155	5	2.05186	0.0663404	1.84074	2.26298
3		2.03099	1.67694	3		1.9461	2.30146	7,5	5.78029	0.0663404	5.56917	5.99142
4		2.18203	1.83024	4		2.09841	2.45144	10	10.1255	0.0663404	9.91438	10.3366
5		2.33307	1.98347	5		2.25071	2.6015
6		2.48411	2.13663	6		2.40302	2.75163
7		2.63515	2.28971	7		2.55532	2.90183	1		1178.71	-638.52	1		1041.34	2887.78	Categoría	Media	Error estándar	Límite inferior (95%)	Límite superior (95%)
8		2.78619	2.4427	8		2.70763	3.05212	2		1237.73	-567.588	2		1102.34	2935.56	5	1301.67	339.864	220.07	2383.27
9		2.93723	2.59562	9		2.85994	3.20249	3		1296.74	-497.048	3		1163.35	2983.75	7,5	2465.71	339.864	1384.11	3547.31
10		3.08826	2.74846	10		3.01224	3.35294	4		1355.76	-426.908	4		1224.35	3032.34	10	4375.64	339.864	3294.04	5457.24
11		3.2393	2.90122	11		3.16455	3.50347	5		1414.77	-357.176	5		1285.36	3081.34
12		3.39034	3.05389	12		3.31685	3.65409	6		1473.79	-287.858	6		1346.37	3130.78
13		3.54138	3.20648	13		3.46916	3.80479	7		1532.8	-218.963	7		1407.37	3180.64	1		212.672	-43.0753	1		189.682	448.737	Categoría	Media	Error estándar	Límite inferior (95%)	Límite superior (95%)
14		3.69242	3.35898	14		3.62147	3.95559	8		1591.82	-150.497	8		1468.38	3230.95	2		224.335	-29.8135	2		201.678	458.981	5	237.102	48.2086	83.6805	390.524
15		3.84346	3.51139	15		3.77377	4.10646	9		1650.83	-82.4682	9		1529.39	3281.71	3		235.998	-16.6069	3		213.674	469.282	7,5	435.304	48.2086	281.882	588.726
16		3.9945	3.66371	16		3.92608	4.25743	10		1709.85	-14.8823	10		1590.39	3332.93	4		247.661	-3.45643	4		225.671	479.64	10	847.863	48.2086	694.441	1001.28
17		4.14554	3.81595	17		4.07838	4.40849	11		1768.86	52.2536	11		1651.4	3384.62	5		259.325	9.63682	5		237.667	490.056
18		4.29658	3.96809	18		4.23069	4.55964	12		1827.88	118.933	12		1712.4	3436.78	6		270.988	22.6719	6		249.664	500.532
19		4.44761	4.12015	19		4.383	4.71089	13		1886.89	185.15	13		1773.41	3489.42	7		282.651	35.6478	7		261.66	511.069	1		0.176161	0.139095	1		0.141499	0.223285	Categoría	Media	Error estándar	Límite inferior (95%)	Límite superior (95%)
20		4.59865	4.27211	20		4.5353	4.86222	14		1945.91	250.899	14		1834.42	3542.54	8		294.314	48.5636	8		273.657	521.667	2		0.176994	0.140465	2		0.142834	0.222531	5	0.182104	0.00701866	0.159768	0.204441
21		4.74969	4.42398	21		4.68761	5.01365	15		2004.93	316.173	15		1895.42	3596.17	9		305.978	61.4185	9		285.653	532.328	3		0.177827	0.141786	3		0.144169	0.22179	7,5	0.176873	0.00701866	0.154537	0.19921
22		4.90073	4.57575	22		4.83991	5.16518	16		2063.94	380.968	16		1956.43	3650.29	10		317.641	74.2113	10		297.65	543.053	4		0.178659	0.143056	4		0.145503	0.221061	10	0.194672	0.00701866	0.172336	0.217009
23		5.05177	4.72743	23		4.99222	5.3168	17		2122.96	445.279	17		2017.44	3704.92	11		329.304	86.9414	11		309.646	553.843	5		0.179492	0.144272	5		0.146838	0.220347
24		5.20281	4.87902	24		5.14453	5.46852	18		2181.97	509.101	18		2078.44	3760.07	12		340.967	99.6079	12		321.642	564.699	6		0.180324	0.145433	6		0.148173	0.219649
25		5.35385	5.03051	25		5.29683	5.62033	19		2240.99	572.43	19		2139.45	3815.73	13		352.631	112.21	13		333.639	575.621	7		0.181157	0.146538	7		0.149508	0.218967
26		5.50489	5.1819	26		5.44914	5.77224	20		2300	635.262	20		2200.45	3871.92	14		364.294	124.747	14		345.635	586.611	8		0.181989	0.147584	8		0.150843	0.218304
27		5.65593	5.3332	27		5.60144	5.92425	21		2359.02	697.593	21		2261.46	3928.64	15		375.957	137.218	15		357.632	597.67	9		0.182822	0.148572	9		0.152178	0.217661
28		5.80697	5.4844	28		5.75375	6.07636	22		2418.03	759.422	22		2322.47	3985.89	16		387.62	149.622	16		369.628	608.797	10		0.183654	0.1495	10		0.153513	0.21704
29		5.958	5.6355	29		5.90606	6.22857	23		2477.05	820.744	23		2383.47	4043.67	17		399.284	161.96	17		381.625	619.995	11		0.184487	0.150367	11		0.154848	0.216443
30		6.10904	5.78651	30		6.05836	6.38087	24		2536.06	881.558	24		2444.48	4101.99	18		410.947	174.229	18		393.621	631.264	12		0.185319	0.151174	12		0.156183	0.215873
31		6.26008	5.93742	31		6.21067	6.53327	25		2595.08	941.862	25		2505.49	4160.86	19		422.61	186.431	19		405.617	642.603	13		0.186152	0.15192	13		0.157517	0.215332
32		6.41112	6.08824	32		6.36297	6.68577	26		2654.09	1001.66	26		2566.49	4220.27	20		434.273	198.563	20		417.614	654.015	14		0.186984	0.152607	14		0.158852	0.214823
33		6.56216	6.23896	33		6.51528	6.83837	27		2713.11	1060.94	27		2627.5	4280.22	21		445.936	210.626	21		429.61	665.5	15		0.187817	0.153234	15		0.160187	0.214349
34		6.7132	6.38958	34		6.66759	6.99107	28		2772.12	1119.71	28		2688.51	4340.73	22		457.6	222.62	22		441.607	677.057	16		0.18865	0.153803	16		0.161522	0.213914
35		6.86424	6.54011	35		6.81989	7.14386	29		2831.14	1177.97	29		2749.51	4401.77	23		469.263	234.544	23		453.603	688.688	17		0.189482	0.154316	17		0.162857	0.213522
36		7.01528	6.69054	36		6.9722	7.29675	30		2890.16	1235.71	30		2810.52	4463.37	24		480.926	246.398	24		465.6	700.393	18		0.190315	0.154773	18		0.164192	0.213178
37		7.16632	6.84088	37		7.1245	7.44973	31		2949.17	1292.95	31		2871.52	4525.51	25		492.589	258.182	25		477.596	712.171	19		0.191147	0.155176	19		0.165527	0.212886
38		7.31735	6.99113	38		7.27681	7.60282	32		3008.19	1349.68	32		2932.53	4588.2	26		504.253	269.896	26		489.592	724.024	20		0.19198	0.155528	20		0.166862	0.212653
39		7.46839	7.14128	39		7.42911	7.75599	33		3067.2	1405.9	33		2993.54	4651.43	27		515.916	281.539	27		501.589	735.951	21		0.192812	0.155831	21		0.168197	0.212484
40		7.61943	7.29134	40		7.58142	7.90926	34		3126.22	1461.62	34		3054.54	4715.2	28		527.579	293.112	28		513.585	747.953	22		0.193645	0.156085	22		0.169532	0.212386
41		7.77047	7.4413	41		7.73373	8.06263	35		3185.23	1516.84	35		3115.55	4779.51	29		539.242	304.614	29		525.582	760.029	23		0.194477	0.156294	23		0.170866	0.212367
42		7.92151	7.59118	42		7.88603	8.21608	36		3244.25	1571.57	36		3176.56	4844.35	30		550.906	316.047	30		537.578	772.179	24		0.19531	0.15646	24		0.172201	0.212434
43		8.07255	7.74096	43		8.03834	8.36963	37		3303.26	1625.8	37		3237.56	4909.73	31		562.569	327.409	31		549.575	784.404	25		0.196142	0.156586	25		0.173536	0.212597
44		8.22359	7.89066	44		8.19064	8.52327	38		3362.28	1679.54	38		3298.57	4975.64	32		574.232	338.702	32		561.571	796.702	26		0.196975	0.156672	26		0.174871	0.212863
45		8.37463	8.04027	45		8.34295	8.677	39		3421.29	1732.79	39		3359.57	5042.06	33		585.895	349.926	33		573.568	809.074	27		0.197807	0.156721	27		0.176206	0.213242
46		8.52567	8.18979	46		8.49526	8.83082	40		3480.31	1785.57	40		3420.58	5109.01	34		597.559	361.081	34		585.564	821.52	28		0.19864	0.156736	28		0.177541	0.213743
47		8.6767	8.33923	47		8.64756	8.98472	41		3539.32	1837.87	41		3481.59	5176.47	35		609.222	372.167	35		597.56	834.039	29		0.199472	0.156718	29		0.178876	0.214374
48		8.82774	8.48858	48		8.79987	9.13871	42		3598.34	1889.7	42		3542.59	5244.43	36		620.885	383.185	36		609.557	846.63	30		0.200305	0.156669	30		0.180211	0.215143
49		8.97878	8.63785	49		8.95217	9.29279	43		3657.35	1941.07	43		3603.6	5312.9	37		632.548	394.136	37		621.553	859.292	31		0.201138	0.156591	31		0.181546	0.216057
50		9.12982	8.78704	50		9.10448	9.44694	44		3716.37	1991.99	44		3664.61	5381.86	38		644.212	405.02	38		633.55	872.027	32		0.20197	0.156486	32		0.18288	0.217122
51		9.28086	8.93615	51		9.25679	9.60118	45		3775.39	2042.45	45		3725.61	5451.3	39		655.875	415.838	39		645.546	884.831	33		0.202803	0.156356	33		0.184215	0.21834
52		9.4319	9.08518	52		9.40909	9.7555	46		3834.4	2092.47	46		3786.62	5521.23	40		667.538	426.59	40		657.543	897.706	34		0.203635	0.156201	34		0.18555	0.219714
53		9.58294	9.23413	53		9.5614	9.9099	47		3893.42	2142.05	47		3847.62	5591.63	41		679.201	437.277	41		669.539	910.65	35		0.204468	0.156024	35		0.186885	0.221242
54		9.73398	9.38301	54		9.7137	10.0644	48		3952.43	2191.21	48		3908.63	5662.5	42		690.865	447.901	42		681.535	923.662	36		0.2053	0.155826	36		0.18822	0.222923
55		9.88502	9.53181	55		9.86601	10.2189	49		4011.45	2239.94	49		3969.64	5733.82	43		702.528	458.461	43		693.532	936.742	37		0.206133	0.155608	37		0.189555	0.224752
56		10.0361	9.68053	56		10.0183	10.3736	50		4070.46	2288.25	50		4030.64	5805.59	44		714.191	468.96	44		705.528	949.889	38		0.206965	0.155371	38		0.19089	0.226722
57		10.1871	9.82919	57		10.1706	10.5283	51		4129.48	2336.16	51		4091.65	5877.8	45		725.854	479.396	45		717.525	963.101	39		0.207798	0.155117	39		0.192225	0.228827
58		10.3381	9.97777	58		10.3229	10.683	52		4188.49	2383.67	52		4152.66	5950.45	46		737.518	489.773	46		729.521	976.377	40		0.20863	0.154846	40		0.19356	0.231058
59		10.4892	10.1263	59		10.4752	10.8379	53		4247.51	2430.78	53		4213.66	6023.52	47		749.181	500.089	47		741.518	989.718	41		0.209463	0.15456	41		0.194895	0.233406
60		10.6402	10.2747	60		10.6275	10.9928	54		4306.52	2477.51	54		4274.67	6097	48		760.844	510.347	48		753.514	1003.12	42		0.210295	0.15426	42		0.196229	0.235863
61		10.7912	10.4231	61		10.7798	11.1478	55		4365.54	2523.86	55		4335.67	6170.89	49		772.507	520.548	49		765.51	1016.59	43		0.211128	0.153945	43		0.197564	0.238418
62		10.9423	10.5714	62		10.9322	11.3028	56		4424.55	2569.85	56		4396.68	6245.19	50		784.171	530.692	50		777.507	1030.11	44		0.211961	0.153618	44		0.198899	0.241065
63		11.0933	10.7197	63		11.0845	11.4579	57		4483.57	2615.47	57		4457.69	6319.87	51		795.834	540.78	51		789.503	1043.7	45		0.212793	0.153278	45		0.200234	0.243794
64		11.2444	10.8679	64		11.2368	11.6131	58		4542.58	2660.73	58		4518.69	6394.94	52		807.497	550.814	52		801.5	1057.34	46		0.213626	0.152928	46		0.201569	0.246598
65		11.3954	11.016	65		11.3891	11.7684	59		4601.6	2705.65	59		4579.7	6470.37	53		819.16	560.794	53		813.496	1071.04	47		0.214458	0.152566	47		0.202904	0.249469
66		11.5464	11.1641	66		11.5414	11.9236	60		4660.61	2750.23	60		4640.71	6546.18	54		830.824	570.721	54		825.493	1084.8	48		0.215291	0.152194	48		0.204239	0.252402
67		11.6975	11.3121	67		11.6937	12.079	61		4719.63	2794.49	61		4701.71	6622.34	55		842.487	580.598	55		837.489	1098.61	49		0.216123	0.151813	49		0.205574	0.255391
68		11.8485	11.46	68		11.846	12.2344	62		4778.65	2838.41	62		4762.72	6698.85	56		854.15	590.423	56		849.486	1112.47	50		0.216956	0.151423	50		0.206909	0.258429
69		11.9996	11.6079	69		11.9983	12.3899	63		4837.66	2882.02	63		4823.72	6775.7	57		865.813	600.2	57		861.482	1126.39	51		0.217788	0.151024	51		0.208244	0.261513
70		12.1506	11.7558	70		12.1506	12.5454	64		4896.68	2925.32	64		4884.73	6852.88	58		877.477	609.928	58		873.478	1140.36	52		0.218621	0.150617	52		0.209578	0.264637
								65		4955.69	2968.33	65		4945.74	6930.38	59		889.14	619.608	59		885.475	1154.38	53		0.219453	0.150202	53		0.210913	0.267799
								66		5014.71	3011.03	66		5006.74	7008.2	60		900.803	629.243	60		897.471	1168.45	54		0.220286	0.14978	54		0.212248	0.270994
								67		5073.72	3053.45	67		5067.75	7086.33	61		912.466	638.832	61		909.468	1182.56	55		0.221118	0.149352	55		0.213583	0.27422
								68		5132.74	3095.59	68		5128.76	7164.75	62		924.13	648.377	62		921.464	1196.73	56		0.221951	0.148917	56		0.214918	0.277474
								69		5191.75	3137.46	69		5189.76	7243.47	63		935.793	657.879	63		933.461	1210.94	57		0.222784	0.148475	57		0.216253	0.280753
								70		5250.77	3179.06	70		5250.77	7322.48	64		947.456	667.339	64		945.457	1225.19	58		0.223616	0.148028	58		0.217588	0.284055
																65		959.119	676.757	65		957.453	1239.49	59		0.224449	0.147575	59		0.218923	0.287378
																66		970.783	686.135	66		969.45	1253.83	60		0.225281	0.147117	60		0.220258	0.29072
																67		982.446	695.474	67		981.446	1268.22	61		0.226114	0.146654	61		0.221592	0.29408
																68		994.109	704.775	68		993.443	1282.64	62		0.226946	0.146186	62		0.222927	0.297456
																69		1005.77	714.038	69		1005.44	1297.1	63		0.227779	0.145713	63		0.224262	0.300848
																70		1017.44	723.265	70		1017.44	1311.61	64		0.228611	0.145236	64		0.225597	0.304253
																								65		0.229444	0.144755	65		0.226932	0.30767
																								66		0.230276	0.14427	66		0.228267	0.3111
																								67		0.231109	0.143781	67		0.229602	0.31454
																								68		0.231941	0.143289	68		0.230937	0.317991
																								69		0.232774	0.142793	69		0.232272	0.32145
																								70		0.233607	0.142294	70		0.233607	0.324919

## Sheet: XLSTAT_20231206_175022_1_HID1
Resumen (Medias) - RAW cuinat (Color):				Resumen (Medias) - Concentracio (Color):				Resumen (Medias) - RAW cuinat*Concentracio (Color):
Categoría	Y50 (Pa.s)	G' (Pa)	G'' (Pa)	Categoría	Y50 (Pa.s)	G' (Pa)	G'' (Pa)	Categoría	Y50 (Pa.s)	G' (Pa)	G'' (Pa)
Llentilla	6.31529	3065.27	580.059	10	10.4307	4494.55	872.848	Llentilla*10	10.7359	4613.47	897.832
Cigró	5.98588	2714.34	506.756	7,5	5.78011	2863.93	515.592	Cigró*10	10.1255	4375.64	847.863
				5	2.24092	1310.93	241.784	Llentilla*7,5	5.77993	3262.16	595.881
								Cigró*7,5	5.7803	2465.71	435.304
								Llentilla*5	2.42999	1320.19	246.465
								Cigró*5	2.05186	1301.67	237.102

## Sheet: XLSTAT_20231206_175022_1_HID
1		1.7045	0.629999	1		1.64149	2.7178	1		1169.2	-36.2733	1		1041.34	2257.47	1		210.673	40.2048	1		189.682	361.362	1		0.176134	0.148736	1		0.141499	0.194521
2		1.86651	0.796581	2		1.80441	2.87607	2		1232.49	32.0455	2		1106.48	2317.1	2		223.234	53.46	2		202.547	373.477	2		0.176979	0.149908	2		0.142846	0.19464
3		2.02852	0.963011	3		1.96733	3.03449	3		1295.78	100.196	3		1171.62	2376.9	3		235.795	66.6913	3		215.413	385.616	3		0.177824	0.151054	3		0.144193	0.194767
4		2.19052	1.12929	4		2.13026	3.19306	4		1359.07	168.176	4		1236.76	2436.87	4		248.357	79.8982	4		228.278	397.78	4		0.178669	0.152174	4		0.14554	0.194905
5		2.35253	1.29541	5		2.29318	3.35179	5		1422.36	235.983	5		1301.91	2497.02	5		260.918	93.0805	5		241.143	409.97	5		0.179514	0.153268	5		0.146887	0.195052
6		2.51454	1.46138	6		2.4561	3.51068	6		1485.64	303.616	6		1367.05	2557.36	6		273.479	106.238	6		254.009	422.185	6		0.180359	0.154334	6		0.148234	0.195211
7		2.67655	1.62718	7		2.61902	3.66972	7		1548.93	371.072	7		1432.19	2617.88	7		286.04	119.37	7		266.874	434.426	7		0.181204	0.155372	7		0.149581	0.195382
8		2.83856	1.79283	8		2.78195	3.82893	8		1612.22	438.35	8		1497.33	2678.58	8		298.602	132.477	8		279.74	446.693	8		0.182049	0.156382	8		0.150927	0.195566
9		3.00057	1.95832	9		2.94487	3.9883	9		1675.51	505.447	9		1562.48	2739.47	9		311.163	145.559	9		292.605	458.987	9		0.182894	0.157362	9		0.152274	0.195765
10		3.16258	2.12364	10		3.10779	4.14783	10		1738.8	572.363	10		1627.62	2800.55	10		323.724	158.614	10		305.471	471.307	10		0.183739	0.158313	10		0.153621	0.195979
11		3.32459	2.2888	11		3.27071	4.30754	11		1802.09	639.095	11		1692.76	2861.82	11		336.285	171.643	11		318.336	483.655	11		0.184584	0.159233	11		0.154968	0.196209
12		3.4866	2.45379	12		3.43364	4.46741	12		1865.38	705.642	12		1757.9	2923.28	12		348.847	184.646	12		331.202	496.03	12		0.185429	0.160123	12		0.156315	0.196457
13		3.64861	2.61861	13		3.59656	4.62744	13		1928.67	772.002	13		1823.05	2984.94	13		361.408	197.623	13		344.067	508.432	13		0.186274	0.160982	13		0.157662	0.196725
14		3.81062	2.78326	14		3.75948	4.78765	14		1991.96	838.174	14		1888.19	3046.8	14		373.969	210.573	14		356.933	520.862	14		0.187119	0.161811	14		0.159009	0.197013
15		3.97263	2.94774	15		3.9224	4.94804	15		2055.25	904.155	15		1953.33	3108.85	15		386.53	223.495	15		369.798	533.321	15		0.187964	0.162609	15		0.160356	0.197325
16		4.13464	3.11205	16		4.08533	5.10859	16		2118.54	969.946	16		2018.47	3171.11	16		399.092	236.391	16		382.664	545.807	16		0.188809	0.163377	16		0.161703	0.197662
17		4.29665	3.27619	17		4.24825	5.26932	17		2181.83	1035.54	17		2083.61	3233.56	17		411.653	249.259	17		395.529	558.322	17		0.189654	0.164115	17		0.16305	0.198026
18		4.45865	3.44015	18		4.41117	5.43023	18		2245.12	1100.95	18		2148.76	3296.22	18		424.214	262.1	18		408.395	570.865	18		0.190499	0.164823	18		0.164397	0.198419
19		4.62066	3.60394	19		4.57409	5.59131	19		2308.41	1166.16	19		2213.9	3359.09	19		436.775	274.914	19		421.26	583.437	19		0.191344	0.165502	19		0.165744	0.198844
20		4.78267	3.76755	20		4.73702	5.75257	20		2371.7	1231.17	20		2279.04	3422.16	20		449.337	287.699	20		434.126	596.038	20		0.192189	0.166152	20		0.167091	0.199304
21		4.94468	3.93098	21		4.89994	5.91401	21		2434.99	1295.99	21		2344.18	3485.43	21		461.898	300.457	21		446.991	608.668	21		0.193034	0.166774	21		0.168438	0.199802
22		5.10669	4.09424	22		5.06286	6.07563	22		2498.27	1360.61	22		2409.33	3548.92	22		474.459	313.187	22		459.856	621.327	22		0.193879	0.167368	22		0.169785	0.20034
23		5.2687	4.25732	23		5.22578	6.23743	23		2561.56	1425.04	23		2474.47	3612.61	23		487.02	325.889	23		472.722	634.016	23		0.194724	0.167936	23		0.171132	0.200922
24		5.43071	4.42022	24		5.38871	6.39941	24		2624.85	1489.26	24		2539.61	3676.51	24		499.582	338.562	24		485.587	646.734	24		0.195569	0.168479	24		0.172479	0.201553
25		5.59272	4.58294	25		5.55163	6.56157	25		2688.14	1553.29	25		2604.75	3740.62	25		512.143	351.208	25		498.453	659.481	25		0.196414	0.168996	25		0.173826	0.202234
26		5.75473	4.74548	26		5.71455	6.72392	26		2751.43	1617.11	26		2669.9	3804.94	26		524.704	363.825	26		511.318	672.258	26		0.197259	0.16949	26		0.175173	0.20297
27		5.91674	4.90784	27		5.87747	6.88644	27		2814.72	1680.74	27		2735.04	3869.48	27		537.265	376.415	27		524.184	685.064	27		0.198104	0.16996	27		0.17652	0.203765
28		6.07875	5.07002	28		6.0404	7.04915	28		2878.01	1744.17	28		2800.18	3934.22	28		549.827	388.976	28		537.049	697.9	28		0.198949	0.170408	28		0.177867	0.204622
29		6.24076	5.23201	29		6.20332	7.21204	29		2941.3	1807.39	29		2865.32	3999.18	29		562.388	401.508	29		549.915	710.766	29		0.199794	0.170834	29		0.179214	0.205545
30		6.40277	5.39383	30		6.36624	7.37512	30		3004.59	1870.42	30		2930.47	4064.35	30		574.949	414.013	30		562.78	723.661	30		0.200639	0.171241	30		0.180561	0.206536
31		6.56478	5.55547	31		6.52916	7.53837	31		3067.88	1933.25	31		2995.61	4129.73	31		587.51	426.489	31		575.646	736.586	31		0.201484	0.171628	31		0.181908	0.2076
32		6.72679	5.71693	32		6.69209	7.70181	32		3131.17	1995.87	32		3060.75	4195.32	32		600.072	438.937	32		588.511	749.54	32		0.202329	0.171996	32		0.183255	0.208738
33		6.88879	5.87821	33		6.85501	7.86543	33		3194.46	2058.3	33		3125.89	4261.12	33		612.633	451.357	33		601.377	762.524	33		0.203174	0.172346	33		0.184602	0.209951
34		7.0508	6.03931	34		7.01793	8.02923	34		3257.75	2120.53	34		3191.04	4327.14	34		625.194	463.749	34		614.242	775.538	34		0.204019	0.17268	34		0.185949	0.211242
35		7.21281	6.20023	35		7.18085	8.19321	35		3321.04	2182.56	35		3256.18	4393.36	35		637.755	476.113	35		627.108	788.581	35		0.204864	0.172997	35		0.187296	0.212611
36		7.37482	6.36097	36		7.34378	8.35737	36		3384.33	2244.4	36		3321.32	4459.8	36		650.317	488.45	36		639.973	801.653	36		0.205709	0.173299	36		0.188642	0.214057
37		7.53683	6.52154	37		7.5067	8.52171	37		3447.62	2306.03	37		3386.46	4526.44	37		662.878	500.758	37		652.839	814.754	37		0.206554	0.173587	37		0.189989	0.215579
38		7.69884	6.68192	38		7.66962	8.68623	38		3510.9	2367.48	38		3451.61	4593.3	38		675.439	513.039	38		665.704	827.884	38		0.207399	0.173861	38		0.191336	0.217177
39		7.86085	6.84213	39		7.83254	8.85093	39		3574.19	2428.72	39		3516.75	4660.36	39		688	525.293	39		678.569	841.043	39		0.208244	0.174121	39		0.192683	0.218848
40		8.02286	7.00217	40		7.99547	9.01581	40		3637.48	2489.77	40		3581.89	4727.62	40		700.562	537.519	40		691.435	854.231	40		0.209089	0.174369	40		0.19403	0.220589
41		8.18487	7.16203	41		8.15839	9.18086	41		3700.77	2550.63	41		3647.03	4795.1	41		713.123	549.718	41		704.3	867.448	41		0.209934	0.174606	41		0.195377	0.222397
42		8.34688	7.32172	42		8.32131	9.34609	42		3764.06	2611.3	42		3712.18	4862.77	42		725.684	561.89	42		717.166	880.693	42		0.210779	0.174831	42		0.196724	0.224268
43		8.50889	7.48124	43		8.48423	9.51149	43		3827.35	2671.78	43		3777.32	4930.65	43		738.245	574.036	43		730.031	893.966	43		0.211624	0.175045	43		0.198071	0.2262
44		8.6709	7.64059	44		8.64716	9.67707	44		3890.64	2732.07	44		3842.46	4998.73	44		750.807	586.155	44		742.897	907.267	44		0.212469	0.17525	44		0.199418	0.228189
45		8.83291	7.79976	45		8.81008	9.84281	45		3953.93	2792.17	45		3907.6	5067.01	45		763.368	598.247	45		755.762	920.596	45		0.213314	0.175444	45		0.200765	0.230231
46		8.99492	7.95877	46		8.973	10.0087	46		4017.22	2852.09	46		3972.75	5135.49	46		775.929	610.314	46		768.628	933.952	46		0.214159	0.17563	46		0.202112	0.232321
47		9.15693	8.11762	47		9.13592	10.1748	47		4080.51	2911.82	47		4037.89	5204.16	47		788.49	622.354	47		781.493	947.336	47		0.215004	0.175807	47		0.203459	0.234458
48		9.31893	8.2763	48		9.29885	10.3411	48		4143.8	2971.37	48		4103.03	5273.03	48		801.052	634.369	48		794.359	960.747	48		0.215849	0.175975	48		0.204806	0.236636
49		9.48094	8.43481	49		9.46177	10.5075	49		4207.09	3030.73	49		4168.17	5342.09	49		813.613	646.359	49		807.224	974.184	49		0.216694	0.176136	49		0.206153	0.238854
50		9.64295	8.59316	50		9.62469	10.6741	50		4270.38	3089.92	50		4233.32	5411.35	50		826.174	658.323	50		820.09	987.648	50		0.217539	0.17629	50		0.2075	0.241107
51		9.80496	8.75136	51		9.78761	10.8408	51		4333.67	3148.93	51		4298.46	5480.79	51		838.735	670.263	51		832.955	1001.14	51		0.218384	0.176436	51		0.208847	0.243394
52		9.96697	8.90939	52		9.95054	11.0077	52		4396.96	3207.77	52		4363.6	5550.42	52		851.297	682.178	52		845.821	1014.65	52		0.219229	0.176576	52		0.210194	0.245712
53		10.129	9.06727	53		10.1135	11.1748	53		4460.24	3266.43	53		4428.74	5620.23	53		863.858	694.069	53		858.686	1028.2	53		0.220074	0.176709	53		0.211541	0.248057
54		10.291	9.22499	54		10.2764	11.342	54		4523.53	3324.92	54		4493.89	5690.23	54		876.419	705.936	54		871.551	1041.76	54		0.220919	0.176836	54		0.212888	0.250428
55		10.453	9.38257	55		10.4393	11.5094	55		4586.82	3383.25	55		4559.03	5760.4	55		888.98	717.779	55		884.417	1055.36	55		0.221764	0.176958	55		0.214235	0.252824
56		10.615	9.53999	56		10.6022	11.6769	56		4650.11	3441.4	56		4624.17	5830.76	56		901.542	729.598	56		897.282	1068.97	56		0.222609	0.177073	56		0.215582	0.255241
57		10.777	9.69726	57		10.7651	11.8446	57		4713.4	3499.39	57		4689.31	5901.29	57		914.103	741.395	57		910.148	1082.61	57		0.223454	0.177184	57		0.216929	0.257678
58		10.939	9.85438	58		10.9281	12.0124	58		4776.69	3557.22	58		4754.45	5971.99	58		926.664	753.168	58		923.013	1096.28	58		0.224299	0.17729	58		0.218276	0.260134
59		11.101	10.0114	59		11.091	12.1804	59		4839.98	3614.89	59		4819.6	6042.86	59		939.225	764.919	59		935.879	1109.97	59		0.225144	0.177391	59		0.219623	0.262607
60		11.263	10.1682	60		11.2539	12.3485	60		4903.27	3672.39	60		4884.74	6113.91	60		951.787	776.648	60		948.744	1123.68	60		0.225989	0.177487	60		0.22097	0.265096
61		11.4251	10.3249	61		11.4168	12.5167	61		4966.56	3729.75	61		4949.88	6185.12	61		964.348	788.356	61		961.61	1137.41	61		0.226834	0.177579	61		0.222317	0.267599
62		11.5871	10.4814	62		11.5798	12.6851	62		5029.85	3786.94	62		5015.02	6256.49	62		976.909	800.041	62		974.475	1151.17	62		0.227679	0.177667	62		0.223664	0.270116
63		11.7491	10.6379	63		11.7427	12.8537	63		5093.14	3843.99	63		5080.17	6328.02	63		989.47	811.705	63		987.341	1164.95	63		0.228524	0.177751	63		0.22501	0.272646
64		11.9111	10.7941	64		11.9056	13.0223	64		5156.43	3900.89	64		5145.31	6399.72	64		1002.03	823.349	64		1000.21	1178.75	64		0.229369	0.177831	64		0.226357	0.275187
65		12.0731	10.9503	65		12.0685	13.1912	65		5219.72	3957.64	65		5210.45	6471.57	65		1014.59	834.971	65		1013.07	1192.58	65		0.230214	0.177907	65		0.227704	0.277739
66		12.2351	11.1063	66		12.2315	13.3601	66		5283.01	4014.24	66		5275.59	6543.57	66		1027.15	846.574	66		1025.94	1206.42	66		0.231059	0.17798	66		0.229051	0.280302
67		12.3971	11.2622	67		12.3944	13.5292	67		5346.3	4070.7	67		5340.74	6615.73	67		1039.72	858.157	67		1038.8	1220.29	67		0.231904	0.17805	67		0.230398	0.282873
68		12.5591	11.418	68		12.5573	13.6984	68		5409.59	4127.02	68		5405.88	6688.03	68		1052.28	869.719	68		1051.67	1234.18	68		0.232749	0.178117	68		0.231745	0.285453
69		12.7211	11.5736	69		12.7202	13.8677	69		5472.87	4183.2	69		5471.02	6760.48	69		1064.84	881.263	69		1064.53	1248.08	69		0.233594	0.17818	69		0.233092	0.288042
70		12.8831	11.7291	70		12.8831	14.0371	70		5536.16	4239.25	70		5536.16	6833.08	70		1077.4	892.788	70		1077.4	1262.01	70		0.234439	0.178241	70		0.234439	0.290638

[truncated: 16 more sheets: XLSTAT_20231206_172333_1_HID, XLSTAT_20231206_121853_1_HID, ANOVA1_HID, ANOVA1_HID1, ANOVA1_HID2, ANOVA1_HID3, ANOVA_HID, ANOVA_HID1, ANOVA_HID2, ANOVA_HID3, ANOVA_HID4, ANOVA_HID5, ANOVA_HID6, ANOVA_HID7, ANOVA_HID8, ANOVA_HID9]
